# Supplementary material for: Cropland heterogeneity changes on the Northeast China Plain in the last three decades (1980s–2010s)
Source: PeerJ journal article supplement (doi:10.7717/peerj.9835), 2020-09-08
Supplement: CountyNew.zip [file CroplandHeterogeneity.xlsx]

## Sheet: 2010
3502	3503	3504	3505	3506
0.637618	0.188929	0.311737	0.49064	0.00549446
0.254256	0.526374	0.485763	0.438798	0.401176
0.420989	0.446266	0.526055	0.0690602	0.00914058
0.0792296	0.480872	0.540707	0.529558	0.238489
0.0360564	0.594284	0.553872	0.273735	0.148556
0.297521	0.340535	0.560135	0.500553	0.00366635
0.0360564	0.54723	0.599261	0.518842	0.404071
0.516847	0.591539	0.583236	0.294242	0
0.25794	0.512999	0.506602	0.497947	0.337409
0.019998	0.437127	0.479106	0.266628	0
0.248074	0.473359	0.263475	0.449119	0.0842687
0.0378238	0.240738	0.57928	0.334085	0.33666
0.602856	0.591432	0.442481	0.408061	0.385557
0.120295	0.392731	0.444622	0.342603	0.225425
0	0.394175	0.450927	0.375688	0.339716
0.409118	0.0724635	0.245575	0.429472	0.406847
0.36224	0.207447	0.377339	0.477502	0.323054
0.244148	0.253617	0.541564	0.450974	0.414328
0	0.495735	0.609247	0.361749	0
0.496104	0.360641	0.252968	0.514805	0.320224
0.028953	0.56821	0.348056	0.477404	0.0609788
0	0.484862	0.474693	0.0255665	0
0.363913	0.156213	0.480872	0	0.348725
0.296153	0.00549446	0.304472	0.0398639	0.0397885
0.222696	0.537031	0.595829	0	0.499949
0	0.390768	0.220325	0	0.120295
0.383675	0.411174	0.464179	0.270548	0.420618
0.483968	0.169249	0.423128	0.120079	0.448647
0.0758533	0.541994	0.415002	0.00366635	0.0673536
0	0.421859	0.520284	0.345573	0.297521
0.49068	0.0378238	0.434218	0.194667	0.411174
0.118693	0.552344	0.4975	0.25751	0.370015
0	0.380194	0.591979	0.510564	0.389063
0	0.187449	0.135625	0.0789733	0.334252
0	0.437506	0.501629	0.376602	0.0483574
0.366999	0.373285	0.230842	0.169782	0.131415
0.402455	0.450398	0.436855	0.486188	0.00731921
0.0959086	0.238674	0.387935	0	0.371998
0.244148	0.528818	0.489341	0.328447	0.408786
0	0.424485	0.423128	0.1889	0.180147
0.152609	0.200381	0.339496	0	0.121893
0.443466	0	0.324167	0.234869	0.115478
0.52301	0.543925	0.562392	0.0127732	0
0.302169	0.556361	0.355025	0	0
0.211646	0.459744	0.497004	0.320698	0.397527
0.470392	0.148556	0.55829	0.24119	0.0892774
0.410398	0.298688	0.588242	0.0325114	0.47789
0.590805	0.361572	0.493449	0.104122	0.480147
0.200381	0.0604931	0.314503	0.0770964	0.0750866
0.100847	0.499777	0.501145	0.0127732	0.306251
0.558	0.0959086	0.586734	0.434218	0.0707636
0.104122	0.343873	0.557221	0.418077	0.159252
0.0235901	0.152739	0.438798	0	0
0.391192	0.0253811	0.591458	0.196671	0.187449
0	0.16935	0.477435	0.47118	0.218578
0.293999	0.32643	0.568778	0.344657	0.0253811
0.55401	0.431121	0.404874	0.481934	0.0656435
0	0.102486	0.0271688	0.00914058	0.0518416
0	0.29635	0.512982	0.197018	0.159252
0.0395878	0.175725	0.410252	0	0.242832
0.183078	0.450974	0.327157	0	0.25455
0	0.00366635	0.57236	0	0.232187
0.603236	0.531069	0.405673	0.113981	0
0.570284	0.140815	0.019998	0	0.0127732
0.0825923	0.301012	0.55882	0.1889	0
0.290448	0.0535786	0.178707	0.364456	0.428366
0.0271688	0.479779	0.2702	0.321409	0.00731921
0.445854	0.588928	0.273472	0.205049	0.513559
0.00914058	0.295176	0.241903	0.324158	0.39096
0.0859416	0.0127732	0.385435	0.0539311	0.533189
0	0.578399	0.298723	0.323979	0.435338
0.353069	0.383793	0.0325114	0.385557	0.438706
0.0656435	0.285665	0.0622133	0.370133	0.0570426
0.52534	0.0604931	0.240191	0.492542	0
0.39007	0.459221	0.311169	0	0.0325114
0.486653	0.499929	0.0644748	0	0.105754
0.0127732	0.25455	0.425273	0.100847	0
0.299337	0.405683	0.299426	0.258395	0
0	0	0.517765	0.464276	0.471279
0	0.53074	0.481934	0.0775431	0.0145844
0.0553123	0.132731	0.283203	0.0696505	0.495699
0	0.461559	0.478032	0.107383	0.456563
0.00549446	0.418225	0.384677	0.323514	0.160766
0.0741601	0.00549446	0.459744	0.547853	0.175725
0.0588235	0.515673	0.361687	0.393328	0.269748
0	0.497369	0.489314	0.25794	0.285665
0	0.364722	0.191633	0.499645	0.401642
0.482983	0.14237	0.496104	0.588194	0.583115
0.571423	0.619896	0.407135	0.290448	0.00731921
0	0.469188	0.472365	0.371998	0
0.494542	0.574581	0.479034	0	0.381122
0.2685	0.490353	0.438154	0.35768	0.457096
0	0.150094	0.302631	0.55032	0.411174
0.595546	0.290448	0.49863	0.0413485	0
0.100847	0.437167	0.499966	0.0842687	0.361572
0.244408	0.470837	0.392478	0.275007	0.318374
0.337439	0.29635	0.152858	0.29635	0.54777
0	0.226784	0.535521	0.362537	0.197531
0.0378238	0.526022	0.328568	0.400006	0.162277
0.34688	0.242832	0.120241	0.0696674	0.0842687
0.365411	0.355393	0.211646	0.479003	0.291635
0.272234	0.508147	0.480106	0	0.384484
0	0.105754	0.434218	0.394182	0.382036
0.360604	0.238866	0.488242	0.458695	0.386448
0.452524	0.24546	0.420929	0.462409	0.591109
0.129837	0.568225	0.179322	0.562218	0.11225
0	0.224062	0.47261	0.105509	0.383793
0.0181968	0	0.514014	0.0463417	0.0253811
0.0639301	0.214429	0.44716	0.223497	0.356698
0.28227	0.168288	0.322062	0.232122	0.203218
0.474521	0.471718	0.347713	0.0088986	0.405673
0	0.462307	0.0145844	0.371988	0.16679
0.216767	0.121893	0.475408	0.463476	0.25967
0.267249	0.362537	0.217198	0.356007	0
0.273472	0.492087	0.411946	0.499146	0.191452
0.63254	0.483638	0.497369	0.338132	0.275112
0.190003	0.281744	0.0809126	0.492471	0.498219
0.200381	0.572709	0.202413	0.354518	0.299868
0.35174	0.492087	0.306762	0.343149	0.318011
0	0.443213	0.395261	0.309039	0.417802
0	0	0.43355	0.403582	0.411946
0	0.358658	0.428086	0.359731	0
0	0.261183	0.215559	0.318556	0
0	0.255835	0.529833	0.46765	0
0.150388	0.133793	0.505828	0	0.0378238
0.14547	0.376602	0.485236	0	0.165289
0.215815	0	0.377512	0.286115	0.349737
0.15316	0.126669	0.136839	0.214581	0.344188
0.0325114	0.0535786	0.0181968	0.557786	0
0	0.573564	0.390303	0.202995	0.400006
0.286866	0.536731	0.391244	0.0809126	0.581103
0.496033	0.0307339	0.242417	0.00934559	0.372408
0.244077	0.244468	0	0.0127849	0
0	0.196101	0	0.100847	0.446266
0	0.493621	0.273472	0	0
0	0.461171	0.420613	0.0765818	0
0.33213	0.604819	0.463724	0.280828	0.283633
0.0431057	0	0.527953	0	0.364636
0	0.284461	0.521165	0.399892	0.16679
0	0.0253811	0.614635	0.500015	0.348968
0	0.0775431	0.498816	0.373455	0.496809
0	0.206614	0.253261	0.403596	0.465636
0.0570426	0.0876112	0.293623	0.208443	0.344657
0.0570426	0	0.230579	0.291635	0.56947
0.399183	0.129837	0.417259	0.201801	0.299851
0.392377	0.321586	0.315788	0.338454	0.00183486
0	0.54265	0.0378238	0.510402	0.343632
0	0.467181	0.0992039	0.277165	0.0307339
0.131415	0.473438	0.295176	0.348016	0
0.409619	0.436764	0.462107	0.365731	0
0.346698	0.480147	0.281108	0.076511	0.151629
0.265994	0.028953	0.619139	0.328922	0.492087
0.128255	0.16679	0.479034	0.567577	0.389044
0	0.457633	0.0570426	0.201801	0.450561
0	0	0.382953	0.384677	0.241173
0.521416	0.0307339	0.596244	0.250749	0.117087
0	0.459221	0.331482	0.185448	0.131193
0	0.0181968	0.167954	0.291635	0.55779
0	0.33671	0.415758	0.405673	0.423365
0.42702	0.00183486	0.499359	0.0431057	0.184538
0	0.163785	0.187449	0.369384	0.0570426
0	0.440431	0.612115	0.404071	0.238866
0.617448	0.518949	0.30454	0.223811	0
0.123489	0.560285	0.491854	0.457633	0.498903
0	0.417259	0.00183486	0.464786	0.372925
0.244148	0.334252	0.334252	0.496353	0.527483
0.00183486	0	0.454718	0.157734	0.0145844
0	0.432879	0.275937	0.0165582	0.240191
0	0.315788	0.491419	0.386797	0.549122
0	0	0.494298	0	0.241514
0	0.292819	0.275219	0	0.388926
0	0.535628	0.289257	0.463016	0.253194
0	0.20687	0.371067	0.417259	0.582857
0	0.0825923	0.486304	0.454169	0.494805
0	0.255835	0.274418	0.573866	0.226552
0.0378238	0	0.441935	0.203218	0
0	0	0.287183	0	0.298553
0	0.542655	0.201801	0.488213	0.475104
0.00183486	0.500693	0.442844	0.298688	0.448647
0	0.507143	0.335012	0.477502	0.224676
0	0.483714	0.535422	0.445161	0.568073
0.293999	0.485881	0.0163923	0.397527	0.121389
0.0622133	0	0.311429	0.121893	0.404071
0	0.0959086	0.419038	0.271048	0.25197
0.00183486	0.383793	0.449269	0.0431445	0.0690602
0	0.0741601	0	0.382906	0
0	0	0.437506	0.408617	0.496353
0	0.331955	0.018212	0.534375	0.117087
0.311302	0.200179	0.234869	0.460779	0.433954
0.019998	0	0.457633	0.524263	0.00183486
0	0.159252	0.346661	0.286642	0.393328
0.0518416	0	0.498598	0.121068	0.0378238
0	0.140815	0.184626	0.348725	0
0.338454	0	0.478028	0.207447	0.265852
0	0.525263	0.243844	0.347713	0
0.123489	0.317996	0.173789	0.431526	0.41945
0	0.517299	0.571438	0.151629	0.35814
0.242832	0.45389	0.0741601	0	0.113813
0.496195	0.194667	0.431987	0.0848083	0.304472
0.460081	0	0.459147	0.383793	0.0518416
0.3248	0.0271688	0.580023	0.0395878	0.299851
0	0.354725	0.349256	0.0909403	0
0.565296	0	0.567609	0	0.340986
0	0	0.602583	0.460972	0.30866
0.0253811	0.0395878	0.221327	0	0.434218
0.0725951	0.589252	0.286866	0.430282	0.401642
0	0	0.413481	0.389286	0.526308
0.2358	0	0.376227	0	0.0466102
0	0	0.437336	0.299944	0.245413
0	0.0724635	0.359633	0.457878	0.489112
0.364071	0.328922	0.577809	0.494616	0.190347
0.505646	0.481229	0.246769	0.257117	0.328922
0	0.489017	0.204631	0	0.107383
0	0.483415	0.217198	0	0.259913
0	0.514331	0.0342856	0.22814	0.510543
0	0.507675	0.165289	0.0842687	0.318961
0.321252	0.160766	0.478103	0.53615	0.157734
0	0	0.569318	0.340535	0
0	0.13299	0.618001	0.451406	0.337302
0.203218	0.394175	0.454364	0.194667	0.519655
0.474278	0.241514	0.478656	0.552645	0.511511
0.204631	0	0.573408	0	0
0.264739	0.215815	0.583074	0.205791	0
0.607821	0.211646	0.488454	0	0.376111
0.211297	0.4932	0.606044	0.0758533	0.105754
0.125081	0	0.0570426	0.299679	0.191699
0	0.0892774	0.303277	0.269748	0.395278
0.373374	0	0.282042	0.157734	0.30141
0.0325114	0	0.499929	0.144205	0.00183486
0.454917	0	0.0145844	0.244148	0.157734
0.474634	0.393328	0.359306	0.120295	0.273472
0.355147	0	0.204631	0.5	0.2537
0.330062	0.251804	0.515188	0.500178	0.104122
0.450974	0.419564	0.445829	0	0.223485
0.0109586	0.018212	0.148921	0.3926	0.601753
0	0.426686	0.614032	0.110631	0.472507
0.117087	0.470611	0.415397	0.288854	0
0.406469	0.414092	0.496266	0.321131	0.246364
0.469492	0.237881	0.518117	0	0.180147
0.219954	0.56825	0.338454	0.324598	0.403991
0.0992039	0.344728	0.545864	0.382	0.564726
0	0.42022	0.0895203	0.00731921	0.010967
0	0	0.576603	0.389908	0.0992039
0	0	0.469527	0.0656435	0.423866
0	0.334252	0.573406	0.581111	0.498527
0.118693	0.219954	0.365906	0.470837	0.497763
0	0	0.482626	0.230306	0.57617
0	0.469772	0.528015	0.244898	0.19785
0.0780926	0.46342	0.33112	0.00366635	0.0217957
0	0.440972	0.542449	0	0.313552
0.128255	0.301831	0.19179	0	0.295176
0.491136	0.0925998	0.560967	0.0775431	0.13299
0.314672	0	0.593068	0	0.465272
0	0.019998	0.450298	0.486446	0.471279
0.174818	0.490311	0.326916	0.573568	0
0.00307692	0.481229	0.523097	0.190347	0.357474
0.532309	0.33213	0.490889	0.555637	0.436855
0	0.318011	0.235749	0.470858	0
0	0.233935	0.33213	0.418004	0.428781
	0.32132	0.349733	0.0127732	0
	0.0809126	0.538157	0	0.265994
	0.0656435	0.218504	0	0
	0	0.533346	0	0
	0.0200486	0.239338	0	0.306843
	0.382015	0.241153	0.160766	0.184538
	0	0.422485	0.0235901	0
	0.35174	0.497274	0.147575	0
	0.397527	0.468578	0.00731921	0
	0.395858	0.469036	0.238056	0.00915069
	0.54211	0.32132	0.249376	0.239857
	0.527431	0.5723	0.625988	0.344657
	0	0.267947	0.464043	0.378241
	0	0.408213	0.00731921	0.19323
	0	0.411952	0.171273	0.270851
	0	0.239594	0.446266	0.557354
	0.595788	0.25012	0.123489	0.559388
	0.498431	0.427278	0.0892774	0
	0.432879	0.304283	0.00731921	0.520834
	0.0741601	0.510462	0.1889	0.151536
	0.13613	0.484619	0.125081	0.263942
	0.0342856	0.427384	0.201801	0.295145
	0.416975	0.406393	0.475917	0.424328
	0	0.567598	0.00549446	0
	0	0.341183	0.436201	0.400826
	0	0.0809126	0.0729863	0.370133
	0.204631	0.349544	0.467181	0
	0.125081	0.244028	0.168288	0.185996
	0.480872	0.519235	0.240561	0
	0.483304	0.488272	0.200131	0.0395878
	0.105754	0.271524	0.51989	0.221327
	0	0.201072	0.459221	0.181614
	0	0.434865	0.00366635	0.181614
	0	0.529573	0.283253	0.197531
	0	0.357123	0.11736	0.184538
	0.493119	0	0	0
	0.368254	0.297521	0.297652	0
	0.297521	0.328922	0.475259	0
	0.264736	0.188542	0.638029	0.522676
	0.0942559	0.547912	0.411952	0.380224
	0.3274	0.503465	0.253261	0
	0.00183486	0.463805	0.267249	0.270993
	0	0.460938	0	0.521262
	0	0.375248	0	0.0570426
	0.19323	0.497753	0	0.280855
	0	0.375362	0	0.0555315
	0	0.183486	0.148556	0.019998
	0	0.169782	0.314672	0.116203
	0.312429	0.389576	0.440137	0.352307
	0	0.517606	0	0.49949
	0.246769	0.243784	0.43016	0.186805
	0.343632	0.355599	0.235	0.231004
	0.028953	0.489341	0.156213	0.425273
	0	0.442593	0.4975	0.487857
	0	0.400917	0.0181968	0.376339
	0.107383	0.207447	0.0892774	0.617063
	0.460779	0.277843	0.568766	0.594736
	0.181614	0.229493	0.100847	0.418105
	0.0483574	0.074295	0.510196	0.48494
	0.201184	0.511997	0.421681	0.156213
	0.217239	0.477502	0	0.0145844
	0.0181968	0.247838	0	0
	0	0.475054	0.15825	0.400826
	0.0942559	0.434953	0	0.159252
	0	0.196101	0.656718	0
	0	0.263475	0.0775431	0
	0.0378238	0.566813	0.499541	0.260941
	0.222696	0.371067	0.286866	0
	0	0.580373	0.45915	0.100523
	0	0.437719	0.104122	0.140815
	0.15316	0.234869	0.229493	0.43355
	0.499645	0.396677	0.537557	0.247693
	0.272234	0.532838	0.66281	0.443831
	0	0.502256	0.418105	0.407262
	0.0992039	0.512881	0.42022	0
	0.313552	0.406867	0.0466102	0.29635
	0.00549446	0.478275	0.396052	0.180508
	0.312071	0.46281	0.0253811	0
	0.128255	0.365411	0	0.336522
	0.367309	0.390267	0	0.151629
	0	0.208284	0	0.0360564
	0.282042	0.504929	0	0.487088
	0.00183486	0.509714	0	0.642257
	0	0.316901	0.23791	0.380978
	0.352739	0.253261	0.609955	0.237537
	0.165289	0.417422	0	0.303175
	0	0.202691	0.32958	0.0483574
	0	0.570001	0.214348	0.306762
	0	0.526298	0.486042	0.250674
	0	0.428781	0.322416	0.499645
	0.405673	0.559482	0.354725	0
	0.298688	0.482302	0.325684	0
	0	0.58871	0	0.175725
	0.560572	0.499484	0.0604931	0.163785
	0.425981	0.575875	0.221327	0.464786
	0	0.510919	0.0127732	0.0307339
	0.0934767	0.443213	0.17213	0.165289
	0.0378238	0.467181	0.245261	0
	0	0.497699	0.224584	0
	0.0741601	0.513346	0.00277777	0.293999
	0.425981	0.434882	0.035943	0.244148
	0	0.498431	0.221327	0.279611
	0.0378238	0.438154	0.19276	0.429472
	0.4932	0.525094	0.523374	0
	0.025403	0.422394	0.126669	0.258395
	0.0909403	0.495527	0.357943	0.463395
	0.0673536	0.487392	0.445055	0.493827
	0	0.485105	0.171273	0
	0	0.477111	0.405987	0.246769
	0.237537	0.481675	0.334252	0.0975579
	0.354054	0.589231	0.15316	0.577145
	0.0639301	0.511383	0.304697	0.0859416
	0.531428	0.373231	0.270558	0.168288
	0.120295	0.319117	0.202798	0.489071
	0.41651	0.32175	0	0.412716
	0.302631	0.560292	0	0.25455
	0	0.519493	0.13783	0.205125
	0	0.59808	0	0.580566
	0.128255	0.482764	0	0.338394
	0.14547	0.206614	0.397274	0.00366635
	0	0.604733	0.291635	0.31283
	0	0.527494	0	0.418999
	0.139257	0.521563	0	0.58724
	0.20885	0.353167	0.398182	0.576598
	0	0.272522	0	0.430767
	0.367309	0.387446	0.113866	0.467341
	0.0127732	0.332059	0	0.165289
	0.221327	0.427286	0	0.0342856
	0.323509	0.333749	0	0.00183486
	0.0483574	0.506813	0.483968	0.497753
	0	0.418746	0.478656	0.26221
	0	0.327867	0.372408	0.315788
	0.450205	0.414987	0.0414766	0.00914058
	0.283253	0.549217	0.473824	0.383793
	0.50516	0.367586	0.0145844	0.0758533
	0.322416	0.434884	0.125081	0.0466523
	0.0448596	0.486142	0.019998	0.311088
	0.121893	0.572988	0.475917	0
	0.147015	0.483977	0.115478	0
	0.0727671	0.289254	0.470235	0
	0.190347	0.463582	0.117087	0.419485
	0	0.418672	0	0.181614
	0	0.411174	0	0.139257
	0.213039	0.517385	0.369063	0.360813
	0.00366635	0.50346	0.295829	0.0307339
	0.385557	0.469026	0.406469	0.151629
	0.00183486	0.56227	0.459744	0
	0.0483574	0.489466	0	0.359633
	0.25967	0.608528	0.496195	0.230842
	0.198958	0.5125	0.571509	0.467746
	0	0.622391	0.620809	0.382643
	0	0.220318	0.474956	0.354256
	0.494348	0.299293	0.529047	0.408997
	0.421681	0	0.415889	0.162925
	0.325684	0.0758533	0.162277	0.533019
	0.294428	0.618065	0.18764	0.600758
	0.100847	0.365486	0.333933	0.456376
	0	0.392763	0.499878	0.642168
	0	0.522144	0	0.550381
	0	0.476716	0.151629	0.418333
	0.265994	0.499423	0.259753	0.219954
	0.171273	0.569353	0.482813	0.178676
	0.0431057	0.431526	0.484889	0.0825923
	0.279611	0.499645	0.514581	0
	0	0.534383	0	0
	0.316901	0.486491	0	0.467018
	0.394898	0.445055	0.120295	0.207447
	0.0325114	0.50128	0.0707636	0.516235
	0	0.507093	0.273472	0.156193
	0	0.471718	0	0.198958
	0.277165	0.0639301	0.32022	0.617773
	0.362537	0.574787	0.583267	0.00366635
	0.495699	0.507973	0.443831	0.0553123
	0.123489	0.537995	0.277413	0
	0.388407	0.495244	0.411174	0.306762
	0.198958	0.0587695	0	0.0792296
	0.0271688	0.272268	0	0.427388
	0.306762	0.512132	0.194541	0.367309
	0.396694	0.333587	0	0.212655
	0.284461	0.484366	0.414243	0.381122
	0.0235901	0.477178	0.383584	0.254823
	0.0378238	0.460263	0.280951	0
	0.312429	0.499693	0.42744	0
	0	0.473064	0.200381	0.320797
	0	0.0235901	0.076538	0.4485
	0	0	0.123609	0.555415
	0	0.32132	0.330791	0.498588
	0.0775431	0.489071	0.0817626	0.485935
	0.0378238	0.0724635	0.499966	0.511724
	0	0.131415	0.227351	0.506197
	0.33636	0.415002	0.00183486	0.361572
	0.498107	0.1838	0.137937	0.49325
	0.477718	0.298688	0.585238	0
	0.1889	0.59946	0.481411	0.00366635
	0	0.222696	0.174244	0.118362
	0	0.369195	0.413434	0.222696
	0.43355	0.344657	0.450974	0.00366635
	0.440077	0.447278	0.549537	0.291331
	0.00183486	0.506324	0.598586	0.284764
	0.371067	0.329995	0.555934	0.347713
	0.14237	0.180508	0.131415	0.0109586
	0	0.481816	0.496907	0.385562
	0	0.370581	0.367309	0.249324
	0.160766	0.544912	0.234075	0
	0	0.502964	0.129837	0
	0	0.387307	0	0.0518416
	0	0.438771	0.585708	0.0992039
	0	0.352013	0.292112	0.0859416
	0.43807	0.0965427	0.452684	0.11225
	0.601172	0.30383	0.0253811	0.290448
	0.273472	0.467181	0.0842687	0
	0	0.236205	0	0.449396
	0	0.631533	0.0145844	0.394461
	0	0.426593	0.492294	0.6067
	0.468115	0	0.269748	0.331508
	0.478983	0.1889	0	0.0775431
	0	0.184726	0	0.428222
	0.440077	0.454364	0.263475	0.365154
	0.00731921	0.506683	0.25197	0.196101
	0	0.567093	0	0.0639301
	0.0859416	0.346698	0.0378238	0.11225
	0.0163923	0.349733	0.37385	0.59196
	0.239119	0.0553123	0.0413485	0.634009
	0	0.249376	0.513164	0.275531
	0.569188	0.0181968	0.444439	0
	0.503926	0	0.109009	0
	0.277413	0.469392	0.0483574	0.460108
	0.343632	0.157734	0.57075	0.00183486
	0.219954	0.400826	0.35768	0.279611
	0	0.00366635	0.253261	0.0307339
	0	0.603991	0.219499	0.553856
	0.0413485	0	0.433459	0
	0	0.153208	0.00914058	0.361572
	0.120295	0.263475	0.552728	0.00549446
	0.344657	0.533611	0.00549784	0.019998
	0.109009	0.607133	0.319117	0.282963
	0	0.0109586	0.0127901	0.169782
	0.0501011	0.0992697	0.179044	0
	0.0325114	0.344364	0.297959	0
	0	0.464697	0.380024	0.0501011
	0.499814	0.622559	0.57827	0.405673
	0.206041	0.384677	0.0626956	0.147015
	0.295176	0	0.445318	0.49922
	0.0992039	0.496954	0.240191	0.358658
	0.42022	0.424271	0.00183486	0
	0.199899	0.479034	0.402776	0.0378238
	0.137962	0.0235901	0.15316	0.499814
	0.507007	0.00731921	0.221327	0.351497
	0.499996	0.458214	0.0553123	0.312884
	0	0.489341	0	0.0656435
	0.298688	0.214314	0.499736	0
	0.0535786	0.388709	0.400993	0.498431
	0	0.0570426	0.503531	0.49403
	0.532622	0.0217957	0.496509	0.47955
	0.00549446	0.521026	0.235537	0.110631
	0	0.225425	0.515731	0.0236576
	0	0.0145844	0.629538	0.129407
	0.621045	0.342886	0.556769	0.355835
	0.194885	0.315414	0.128255	0.064097
	0	0.466709	0.304472	0.366287
	0.334252	0.449295	0.0792296	0
	0.298688	0.499541	0.0360564	0.400826
	0.0501011	0.392114	0	0.0325114
	0.307902	0.17276	0.163785	0
	0.438798	0.623495	0	0
	0	0.522217	0.14237	0.0396839
	0.264736	0.25455	0.336205	0
	0	0.0431057	0.107383	0.264736
	0.191116	0.362183	0	0.233963
	0.371954	0.433902	0.196101	0.226784
	0.418746	0.470392	0.404874	0.181614
	0.328922	0.262049	0.551242	0.531939
	0.207447	0.487088	0.120295	0.117714
	0	0.558992	0	0
	0	0.498026	0.194667	0.151629
	0.48386	0	0.321679	0.215815
	0.464361	0.365755	0.278029	0.168288
	0	0.157613	0.419988	0.465754
	0.00731921	0.121893	0.140815	0.482282
	0.59239	0.189281	0.215815	0
	0	0.481676	0.43355	0
	0.419485	0.639274	0.13299	0.487382
	0.438798	0.476318	0.234869	0.497993
	0.0271688	0.552614	0.0535786	0.105953
	0.211646	0.380172	0.611579	0.399183
	0.222231	0.389908	0.0825923	0
	0.129837	0.0925998	0.360321	0.200381
	0.446266	0.417261	0.0608725	0.450003
	0.439439	0.25967	0.315495	0.296472
	0	0.411174	0.527826	0.47829
	0	0.14237	0.212962	0.570976
	0	0	0.196101	0.381975
	0.389716	0	0	0.174244
	0.412807	0.270993	0.249376	0.412677
	0.00732595	0.490524	0.0501011	0.619427
	0	0.51327	0.356698	0.602534
	0.499291	0.439082	0	0.599246
	0.344657	0.0378238	0.25455	0.115417
	0	0.481589	0.139257	0.51144
	0.21025	0.14237	0.226361	0.394175
	0	0	0.495507	0
	0.174244	0.255835	0.348064	0.229493
	0.441969	0.156213	0.519979	0
	0.00914058	0.565653	0.269748	0.159252
	0.475188	0.496353	0	0.334252
	0.386434	0.547436	0	0.531091
	0	0	0.361572	0
	0	0.344657	0.497758	0.454126
	0.347713	0.413818	0.573134	0.00183486
	0.160766	0.110631	0.234869	0
	0.217198	0.0792296	0	0.371067
	0.408051	0.338454	0	0.23353
	0.00914058	0.428781	0.0553123	0.180147
	0.479408	0.421544	0.11225	0
	0	0.525172	0.236205	0.019998
	0.558761	0.314672	0	0.216261
	0.388178	0.138282	0.21025	0.298313
	0.497875	0.028953	0.333193	0.123489
	0.512385	0.0876112	0.260941	0
	0.363498	0.13613	0.278533	0.431992
	0.241514	0.499595	0.486169	0.505986
	0.204631	0.60489	0.0639301	0.391625
	0.497993	0.119086	0.0623751	0.467605
	0.49064	0.360049	0.301253	0.273489
	0.371067	0.428781	0.129837	0.376253
	0.150094	0.00366635	0.487382	0.491416
	0.0809126	0.342721	0.0360564	0.51708
	0.491679	0.371721	0.528652	0.483638
	0	0.028953	0.457891	0.470972
	0.353734	0.298688	0.457096	0.574866
	0.375688	0.536128	0.448057	0.483708
	0.497298	0.492984	0.473438	0.21604
	0.499848	0.0235901	0.52305	0
	0.499693	0.470837	0	0.274706
	0.133844	0.426939	0.554789	0
	0.345908	0.505587	0.463309	0.206041
	0.453248	0.550875	0.019998	0.0109586
	0.154688	0.385557	0.333193	0
	0.484295	0.423684	0.143922	0.253261
	0.41183	0	0.319117	0.0109586
	0.252152	0.585246	0.500647	0
	0.412716	0.298507	0.290822	0
	0	0.446266	0.472585	0
	0.524244	0.113866	0.499736	0.0360564
	0	0.00366635	0.504037	0.180147
	0	0.226784	0.304708	0.177319
	0.0708917	0	0	0.283253
	0.499966	0.230842	0.421463	0
	0.270993	0.343834	0.0271688	0
	0.00731921	0.466775	0.366362	0.0253811
	0.312444	0	0.102204	0.447573
	0.374391	0.126669	0.499645	0.359633
	0.139257	0.15316	0.509946	0.175725
	0.401652	0.0109586	0.19323	0
	0.0792296	0	0.0909403	0.446866
	0.100847	0.174244	0	0.396188
	0	0.178676	0	0.265657
	0.019998	0.491345	0.180147	0.408557
	0	0.527914	0.0378238	0.455821
	0.23156	0.542119	0.0307339	0.496954
	0.318011	0.0673536	0.469944	0.494805
	0.339496	0.284569	0.0775431	0.484616
	0.115478	0.123489	0.455639	0.512285
	0.00549446	0.394175	0.417901	0.439252
	0.0741601	0	0.461331	0.181614
	0.473013	0.0235901	0.148556	0.21025
	0.533882	0.19179	0.553254	0.019998
	0.397423	0.568766	0.538532	0.478275
	0.410176	0.604725	0.450398	0
	0.425981	0.473752	0.434218	0.0975579
	0.201801	0.311655	0.493508	0.327846
	0.382015	0.458165	0.343632	0.0181968
	0.0466102	0.55829	0.110631	0.245514
	0.0342856	0.432204	0.409619	0.0145844
	0.460779	0.503369	0	0.174244
	0.504639	0.549662	0.413004	0.117087
	0.5468	0	0.356998	0
	0.178993	0	0.157734	0
	0	0.232187	0.0690602	0
	0.13299	0.431132	0.302175	0.314672
	0.0842687	0.559005	0.49524	0.156213
	0	0.479091	0.468115	0.490353
	0.575814	0.378008	0.545053	0
	0.557433	0.129837	0	0.301012
	0.165257	0.496353	0.594657	0.00731921
	0.379324	0.466962	0.41393	0.159252
	0.019998	0.466709	0.510014	0.371964
	0.490716	0.310263	0.32132	0.165525
	0.656258	0.466213	0.0431057	0
	0.24546	0	0.0415508	0.104122
	0	0.445591	0.22814	0.413651
	0.0925998	0.418121	0	0.25967
	0.32277	0.507039	0.0466102	0.15316
	0.442861	0.194667	0.361572	0.46765
	0.512284	0.213039	0	0.00183486
	0.319117	0.128501	0	0.222696
	0.0483574	0.384611	0.299851	0.405366
	0.15316	0.486213	0.277165	0.380116
	0.0466102	0.190347	0.169489	0.271347
	0	0.418746	0.203218	0.493969
	0	0.419485	0.545787	0.194667
	0.159151	0.441706	0.0254486	0
	0.571347	0.248074	0.326428	0.0587695
	0.0892774	0.0483574	0.423811	0.100847
	0.385557	0.449912	0.0625067	0.168288
	0.395338	0.469684	0.468257	0
	0.217198	0.162277	0.177202	0.11225
	0.0127901	0.377512	0.00183486	0.290223
	0.232187	0	0.276821	0.410881
	0.53779	0	0.493028	0
	0	0.494616	0.556513	0
	0.400006	0.198858	0.323873	0
	0.242832	0.403265	0.0253811	0
	0	0.405604	0.578087	0
	0	0.503303	0.184751	0
	0.499359	0.43699	0.210948	0
	0.0992039	0.41651	0.337409	0
	0.0413485	0.356698	0	0.0608439
	0.0342856	0.334252	0.438201	0.104122
	0.393839	0.542994	0.437506	0.432204
	0.364456	0.0307339	0.615464	0.353734
	0.456413	0	0.497642	0.15316
	0.168288	0.128255	0.261628	0
	0	0.263606	0.446016	0
	0.282538	0.497753	0.108943	0.384719
	0	0.539726	0.299062	0.497875
	0	0.311302	0.00183486	0
	0.00366635	0.110631	0.0235901	0
	0	0.115323	0.364136	0.050371
	0	0.415161	0.411764	0.409619
	0	0.610845	0.547504	0.234869
	0.463309	0.416196	0.480872	0.0253811
	0.651116	0.229493	0.421848	0
	0.446836	0.51366	0.178892	0.217198
	0.0235901	0.222696	0.542024	0.335307
	0.148556	0.00366635	0.379324	0.522318
	0	0	0	0.451548
	0	0.501145	0.019998	0.177111
	0	0.473438	0.148556	0.48328
	0	0.488242	0	0.439788
	0	0.516889	0	0.117087
	0.37477	0	0	0.0325401
	0.420952	0.432484	0.499693	0.478275
	0	0.422187	0.487302	0.33213
	0	0.239544	0.338191	0.499541
	0.486791	0.315744	0.346698	0.206668
	0.293999	0	0.0758533	0.292819
	0.492552	0.461801	0	0.266672
	0.294428	0	0.0431057	0
	0.26221	0.414243	0.531155	0
	0.281987	0.159252	0.0501011	0
	0.234869	0.0622133	0	0
	0.498327	0.569659	0	0.25197
	0.00366635	0.493412	0.0145844	0
	0.0604931	0	0.13693	0.028953
	0.0448596	0.25197	0.37477	0.479779
	0.00366635	0.0271688	0	0
	0.469944	0.439439	0.506971	0.430693
	0.530366	0.498219	0.525084	0.596461
	0.0235901	0.436667	0.510692	0.102486
	0	0.467512	0.344035	0
	0.00366635	0.400674	0.498725	0.00183486
	0.156213	0.357832	0	0.488798
	0.154688	0.535891	0.150094	0.474693
	0.447463	0.301804	0.468318	0.0218294
	0.489638	0.2685	0.56051	0.0466102
	0.1031	0.183078	0.607729	0.0145844
	0.143922	0.272234	0.527372	0.282538
	0.0809126	0.269748	0.240115	0.0271688
	0.019998	0.477831	0.561235	0.0431057
	0.287046	0.437294	0.420952	0.424404
	0.0518416	0.599249	0	0.495674
	0.154842	0.544097	0.0825923	0.537317
	0.405673	0.140815	0.298688	0.365066
	0	0.309039	0.0518416	0.505443
	0.475199	0.0235901	0.0809126	0.383154
	0.250674	0.0809126	0.498431	0.398222
	0	0.0870463	0.1889	0.123489
	0	0.418746	0.25455	0.223941
	0.390768	0.27839	0	0.488019
	0.222696	0	0	0
	0.428086	0.134562	0	0.20885
	0.140815	0.128951	0	0.0109586
	0.180147	0.442404	0	0.348725
	0	0.579533	0.00731921	0.0925998
	0.463805	0.207457	0	0.0360564
	0.350738	0.0724635	0.378135	0.377512
	0.393895	0.174244	0.453808	0
	0.150094	0.0604931	0	0.0809126
	0	0	0	0.140815
	0.216116	0.356698	0.0792296	0
	0.398134	0.418746	0.322416	0.253533
	0.123489	0.663587	0	0.355713
	0	0.501707	0	0
	0.326642	0.0954109	0.499693	0
	0.466938	0.455442	0.137696	0.019998
	0.496954	0.433997	0.0587695	0.0909403
	0.442593	0.475512	0.421377	0.515542
	0	0.0431057	0.128255	0.436201
	0.564355	0.512385	0.404874	0.160766
	0.328922	0.543308	0.168288	0.306762
	0.324598	0.502995	0.54523	0.24106
	0.14237	0.592323	0.455467	0.563975
	0.384677	0.220055	0.100847	0.489567
	0.290448	0.382906	0.430395	0.51229
	0.113866	0.245485	0	0.499099
	0	0.308594	0.0127732	0.184538
	0.00183486	0.490889	0.538328	0.00366635
	0.335307	0.460056	0.457096	0.156213
	0.464786	0.4975	0.43016	0.44595
	0.492836	0.294009	0.185996	0.29465
	0.272234	0.348725	0.512577	0.131415
	0.438012	0.0570426	0.485611	0
	0.482966	0	0.552354	0.418949
	0	0	0.147015	0.560014
	0.0570426	0.278936	0.0253811	0.57421
	0.139186	0.272244	0.317191	0.279351
	0.509946	0.0892774	0.281867	0.173883
	0.528845	0.0342856	0.149256	0.132022
	0.019998	0.345527	0.412318	0.140815
	0.0109721	0.369579	0.493298	0.569709
	0.16935	0.370133	0.275804	0.244568
	0.408051	0.407262	0.455255	0.0587695
	0.194667	0.118693	0.14547	0
	0.15316	0.123489	0.366362	0.469947
	0.0325114	0	0.0483574	0.104122
	0.371998	0.244148	0.0271688	0.499688
	0.0163923	0.410338	0	0.303013
	0.280828	0	0	0
	0.280828	0.0639301	0	0
	0	0.0217957	0.00549446	0
	0	0	0.31711	0
	0.377386	0	0	0.204398
	0.0553123	0.225425	0.0342856	0.273472
	0.0690602	0.414243	0.22814	0.444387
	0.325684	0.25922	0.154688	0.471074
	0.00183486	0.379324	0.248074	0.421893
	0.143922	0	0.150094	0.451017
	0.380224	0.0656435	0	0.562159
	0.255835	0.48655	0	0.271205
	0.442242	0.610729	0.019998	0.125081
	0.397527	0.499069	0	0.292981
	0.302169	0.477536	0	0.115478
	0.497234	0.571117	0.0307339	0.236498
	0.151629	0.256138	0	0.459997
	0.295176	0.492888	0	0.518938
	0	0.304472	0.22037	0.329995
	0.147071	0.48557	0.509811	0.48557
	0.482966	0.295176	0.236205	0.41651
	0.0624224	0.156601	0.435928	0.432666
	0.0553123	0.282918	0.204631	0.554465
	0	0.359086	0.420952	0.559528
	0	0.267249	0.433049	0.0342856
	0.563329	0.4327	0	0.443932
	0	0.604809	0.00366635	0.259575
	0	0.477384	0.54093	0.11225
	0.206223	0	0.408051	0.476318
	0.118693	0.13613	0	0.35768
	0.419869	0.23353	0.178676	0
	0.381122	0.554297	0.185996	0.346151
	0	0.256843	0.545261	0.362537
	0	0.194502	0.0271688	0
	0.329995	0.0181968	0.22814	0.503749
	0.474693	0.358658	0.496809	0.272234
	0.430845	0.0942559	0.26831	0.174244
	0.0690602	0.25967	0.466709	0.263475
	0.115478	0.15316	0.536687	0.407262
	0.381122	0.462307	0.229493	0.341571
	0.209451	0.464786	0.00183486	0
	0.435543	0.0570426	0.0917953	0.113866
	0	0.33213	0.377459	0.0182373
	0.388178	0.0271688	0.11225	0.273259
	0.550079	0.0859416	0.245895	0.13613
	0.49403	0.162277	0.608779	0.0609535
	0.390768	0.278182	0.521183	0.39502
	0.295831	0.22814	0.494616	0.249376
	0.458695	0.232187	0	0.286866
	0.00731921	0	0.0127732	0.0501011
	0	0	0.00183486	0.126669
	0.087849	0	0	0.191606
	0.31538	0.482282	0	0.370628
	0.113866	0.379273	0	0
	0.369195	0	0.492456	0.180147
	0.225425	0	0.394175	0.404627
	0.565621	0.0235901	0.457096	0.336764
	0.342603	0.2685	0.154688	0.450772
	0	0.490659	0.265994	0.330786
	0	0.543151	0.395458	0.411441
	0.0604931	0.469286	0.491854	0.231434
	0.491378	0.535236	0.316901	0.480872
	0.431526	0.25967	0	0.471279
	0.60827	0.148582	0	0.318374
	0	0.483638	0	0
	0.503546	0.484221	0.20885	0.357189
	0.219762	0.607275	0.32022	0.503506
	0	0.303504	0	0.00366635
	0.0587695	0.499966	0	0.324598
	0.469957	0.447311	0.0909403	0.442593
	0.33981	0.497369	0.417984	0.264534
	0.395311	0.375227	0	0.129837
	0.349728	0.324598	0.0724635	0.271489
	0.19179	0.390464	0	0.344627
	0	0.329995	0	0.0501888
	0	0.354725	0.0859416	0.41739
	0.0590056	0.503346	0.0975579	0.377776
	0.336542	0	0	0
	0	0.10441	0.387378	0
	0.185996	0.601389	0.117087	0.15225
	0.404734	0.412808	0.475381	0
	0.38525	0	0.0271688	0.461801
	0.449234	0.163785	0	0.465272
	0	0.248074	0.483304	0.299443
	0	0	0.2405	0.537842
	0.1889	0	0.35768	0.568031
	0.0127732	0	0.418535	0.335247
	0.421681	0	0.408162	0.415758
	0.297521	0.319117	0.463193	0.207447
	0.00731921	0.406469	0.499069	0.450398
	0.538097	0	0.443831	0.367309
	0.304472	0.0992039	0.464969	0.591748
	0	0	0.226784	0.174244
	0.478656	0.481934	0.157972	0.207447
	0.130319	0.00183486	0.481811	0.323509
	0.0164261	0.178676	0.518812	0.292819
	0.497753	0	0.074661	0.342603
	0.329995	0.476388	0.156213	0.313552
	0.134562	0.159252	0.527426	0.0127732
	0.17276	0	0.477111	0.00366635
	0	0.408472	0.38585	0.412716
	0.0360564	0.533068	0.327809	0.389908
	0.107774	0.540729	0.113019	0.267249
	0	0.392478	0.283253	0.252546
	0.0570426	0.268574	0.333193	0.450779
	0.0271688	0.19179	0.274706	0.412807
	0.36395	0.219954	0.211646	0.369445
	0.158044	0.0817778	0	0.245721
	0.230842	0.265631	0.180329	0.25455
	0	0.134562	0.0758533	0.538208
	0.382906	0.226784	0.0307339	0.574797
	0.0876112	0.316856	0.0501011	0.109009
	0.315279	0.479165	0.499979	0.331064
	0	0.445662	0.0518416	0.0182373
	0	0.483445	0	0.019998
	0.0163923	0.517232	0.555045	0.0553123
	0.492765	0.456934	0.541321	0.0943452
	0.451639	0.488798	0.577738	0.410398
	0	0.233776	0.0992039	0.222696
	0.458695	0.518254	0	0.328922
	0.169952	0.513296	0.610911	0.429472
	0.399183	0.492653	0.337409	0.13613
	0.455467	0.303616	0	0.512167
	0.565877	0.366498	0.0235901	0.292819
	0.473438	0.42251	0	0.349848
	0.0253811	0.363781	0	0
	0.19067	0.274706	0.295176	0.104122
	0.298688	0.0127732	0.0553123	0.00914058
	0.125389	0.0413485	0	0.303115
	0	0.303602	0	0.0307339
	0.481584	0.0903399	0	0.0964044
	0.0661258	0.397554	0	0.546859
	0.0587695	0.546546	0.110459	0.111812
	0.549775	0.1889	0.315298	0.411898
	0.162277	0.102486	0	0.559057
	0.497369	0.0725951	0	0.460779
	0.36608	0.273472	0.3628	0.498816
	0.241514	0	0.458149	0
	0	0.00549446	0.307902	0
	0.0724635	0.291635	0.028953	0
	0.0622133	0.107383	0.139257	0
	0	0.165289	0.148313	0.35768
	0.372757	0.00549446	0.335378	0.137102
	0.345679	0.234869	0.459656	0.341517
	0.108112	0.371067	0.403265	0.273472
	0.499848	0.468115	0.102486	0.346504
	0.0213879	0	0.183078	0.403464
	0.39778	0.109009	0.381122	0.605421
	0.344657	0.0992039	0.448151	0.504275
	0	0.470392	0.46164	0.151309
	0.33213	0.0673536	0.0920533	0.341571
	0.118693	0.353506	0.253897	0.347362
	0.475512	0.109009	0.48494	0.227836
	0.510047	0	0.0360564	0.328922
	0.418004	0.458707	0.328568	0.183263
	0.269859	0.498124	0	0.232187
	0.436201	0.51109	0	0.025403
	0	0.22814	0.134137	0.394175
	0.214429	0.529263	0.47386	0.0271688
	0.267168	0.0895203	0.312429	0.456014
	0.110631	0.188188	0.159565	0
	0.490616	0.60556	0.0673536	0
	0.0413485	0.273472	0	0.128255
	0.36905	0.37862	0	0.305381
	0.148546	0.467181	0.314672	0.144374
	0.0724635	0.21025	0.476318	0.129837
	0.236943	0.461953	0	0.498903
	0	0.36533	0.452118	0.371998
	0	0.554573	0.499949	0.376602
	0.0413485	0.51705	0	0.351973
	0.301012	0.400634	0	0
	0.576064	0.508479	0	0.0673536
	0.496353	0.359633	0.010967	0.337409
	0.465323	0.00183486	0.461292	0.00731921
	0.104221	0	0.0253811	0.236454
	0.0236407	0.00183486	0.110631	0.489837
	0.15316	0.324361	0.38652	0.129837
	0.26136	0.480022	0.0911882	0.131415
	0.468212	0.203218	0.168288	0
	0.201801	0	0.0604931	0.0271688
	0.115478	0	0.0762277	0.0587695
	0.160766	0	0	0.386726
	0.187449	0.216404	0	0
	0	0.301012	0	0.0604931
	0.454917	0.19179	0	0
	0.479408	0	0.221327	0
	0.00914058	0.1889	0	0.346782
	0.242832	0.337409	0	0.572126
	0.337409	0.397008	0	0.0271688
	0.342603	0	0	0.0217957
	0.450974	0.441341	0	0.00183486
	0.0217957	0.491955	0.307902	0.505489
	0.00731921	0.499949	0.117983	0.0253811
	0.00731921	0.495352	0.213039	0
	0.110631	0	0.311237	0
	0.221327	0.00183486	0.0378238	0
	0.297521	0.0360564	0.312429	0.327846
	0.0307339	0.128255	0.462307	0.00731921
	0.233604	0	0.440532	0.486791
	0.470291	0	0.348725	0
	0.0109586	0.157734	0.439036	0.0271688
	0.207447	0.177202	0.0909403	0.562717
	0.382906	0.219954	0	0.0360564
	0.337802	0.161432	0.297008	0.21025
	0.0342856	0.442593	0.214429	0
	0.238866	0.497669	0.304992	0.0181968
	0.271428	0.152975	0.488798	0.019998
	0.553366	0.573755	0.328209	0.304472
	0.390707	0.427145	0.418746	0.499291
	0.597326	0.0724635	0.427696	0
	0.343632	0.267249	0.0181968	0.511381
	0.501199	0.224062	0	0.142789
	0.400826	0.279644	0.376602	0.253093
	0.302169	0.322308	0.280616	0
	0.48494	0.207948	0.459744	0
	0.148556	0.495527	0.456702	0
	0.168288	0.513215	0	0.0109586
	0.104122	0.0937837	0.139257	0.493621
	0.473013	0.579084	0.418288	0.513285
	0	0.483304	0.368254	0.0930753
	0.13613	0.523824	0.131415	0.147834
	0.00183486	0.466709	0.218423	0.115697
	0.376602	0.479034	0.187449	0
	0.465754	0	0.289257	0.0448596
	0	0.364368	0.102486	0.33636
	0	0.575121	0	0
	0	0	0.170903	0.45829
	0.561066	0	0.148637	0.368628
	0.270993	0.229415	0.217713	0.317191
	0.292819	0.00183486	0.00183486	0.1889
	0.196101	0.0925998	0	0
	0.00549446	0.396962	0.00549446	0.0307339
	0.0448596	0.0622133	0.0793746	0.244367
	0.27122	0	0.115687	0
	0.0876112	0.115478	0.23353	0
	0.606246	0.209066	0.482966	0.537439
	0.0503491	0.409619	0.129985	0.217198
	0	0.328922	0.475674	0.415758
	0.00915069	0.232187	0.35768	0.14237
	0.512102	0	0.442593	0
	0.402455	0	0.0483574	0.0360564
	0.0360564	0.22814	0.237537	0.314672
	0.406568	0.156213	0	0
	0.430845	0.123489	0	0
	0.493827	0	0.140815	0.489871
	0.14547	0	0	0
	0.304472	0	0.46765	0
	0.483638	0.187449	0	0
	0.14547	0.00731921	0	0
	0.271288	0	0	0
	0.383793	0.304899	0	0.272234
	0	0.523097	0.150094	0.488638
	0.0109586	0.137696	0.126669	0.497875
	0	0	0.446488	0.376426
	0.187449	0.293999	0.123985	0.0604931
	0.345679	0.314023	0.197531	0.470854
	0	0.479408	0.0109586	0
	0	0.343878	0	0.183078
	0.471279	0	0.250674	0.0570426
	0.567071	0.0127732	0.354725	0.143922
	0.00183486	0.311043	0.367168	0.487533
	0	0.0145844	0.518584	0.505443
	0	0.162277	0.0992039	0.586815
	0.11225	0.315674	0	0.556484
	0.148556	0.432879	0.385887	0
	0.167773	0.44721	0.410398	0.528465
	0	0.230619	0.219954	0.00731921
	0.161953	0.357182	0.163785	0.102486
	0.258425	0.581749	0.554447	0
	0.186552	0.498048	0.556938	0.140815
	0.1889	0.565594	0.43355	0.590714
	0.29081	0.424413	0.143922	0.392362
	0.323509	0.468409	0.205484	0.456921
	0.549571	0.483462	0.0127934	0.0658155
	0.525807	0.353734	0.0959086	0.244048
	0.316901	0	0.00366635	0.560358
	0.214429	0.413265	0.571392	0.312156
	0.117087	0.449479	0.551492	0.147015
	0	0	0.418291	0
	0.0741601	0	0.457096	0
	0.299919	0.300364	0.0109737	0
	0.458695	0.461801	0.415522	0.434892
	0.293999	0.401642	0.376153	0.536442
	0	0.122157	0.536621	0.458928
	0.512881	0.404648	0.430089	0.121893
	0.396694	0.104122	0.333596	0.215815
	0.337409	0.265994	0.411488	0.466233
	0.417259	0.170519	0.177202	0.00914058
	0.327846	0.428518	0.497082	0.211646
	0.0535786	0.334252	0.180147	0
	0.156213	0.00549446	0.388178	0.165289
	0.0235901	0.0342856	0	0.510208
	0	0.0690602	0.369621	0.279499
	0.184538	0.217198	0.0361424	0.54972
	0.580187	0	0.212436	0.504755
	0.312429	0.408051	0.431526	0.382073
	0.527968	0.0571893	0	0
	0.391625	0.218578	0.169782	0
	0.44291	0.290701	0.0942559	0.253261
	0	0.51584	0.323509	0.24546
	0.0307339	0.25967	0.473974	0.174244
	0.429472	0	0.0145844	0.00731921
	0.0466102	0	0.37842	0.17276
	0	0.255835	0.302169	0.197779
	0.158761	0.600516	0.248074	0.426089
	0.504032	0.33636	0.196101	0.227867
	0.505241	0.389908	0	0.0570426
	0.272025	0.0992039	0.389908	0
	0.391625	0	0	0.400006
	0.0413485	0.0535786	0.291635	0.0859416
	0	0	0	0.140815
	0	0.0271688	0	0.139257
	0.165289	0.490559	0.395261	0
	0.505986	0.0849095	0.165525	0.0809126
	0.028953	0.510007	0.258466	0
	0	0	0.196549	0.237196
	0.0587695	0	0.277651	0.384677
	0.498259	0.0892774	0.0109586	0.415758
	0.446866	0.237289	0.11225	0.496033
	0.255192	0.222696	0	0.498107
	0.282113	0.198958	0.00914058	0
	0.499291	0.0360564	0.501942	0
	0.449817	0.471242	0.420937	0.00549446
	0.496809	0.503298	0.0909403	0.301561
	0	0.476716	0.0271688	0.0360564
	0.0109586	0.434882	0.267249	0.230326
	0.412716	0.498102	0.0483574	0.499878
	0	0.398312	0.0587695	0.203218
	0.405673	0.439996	0.316901	0.19179
	0.348185	0.0899149	0.412716	0.00183486
	0.449129	0.0969427	0.470392	0.304472
	0.454	0.460628	0.470166	0.322416
	0.364785	0.356405	0.15825	0
	0.333193	0.238927	0.0360564	0.128255
	0.23353	0.019998	0.409619	0.22814
	0	0	0.465272	0.213039
	0	0.0235901	0.297521	0.0673536
	0.156213	0	0.258167	0
	0.514763	0.214429	0.00914058	0.472365
	0	0.101885	0.506664	0.4421
	0	0.0825923	0.606664	0.397527
	0.495802	0.324598	0.253533	0.20885
	0.417605	0.0842687	0	0
	0.569375	0.271288	0.165289	0
	0.43355	0.415862	0.436855	0.0466102
	0.227745	0.363576	0.277165	0.109009
	0.381122	0.242832	0.562493	0
	0.269404	0.375831	0.277165	0
	0.442151	0.463171	0.383144	0
	0.152858	0.180147	0.104122	0.177202
	0	0.0360564	0.163908	0.0724635
	0.271458	0	0.436425	0.00183486
	0.390768	0	0.383793	0
	0.113866	0.487044	0.14237	0
	0.0570426	0.403806	0	0
	0	0.363024	0.26221	0
	0.298688	0.381165	0.341893	0
	0.423128	0.0146097	0.175725	0
	0.297521	0	0.332231	0.0656435
	0.197531	0.443213	0.472153	0.0501011
	0.386434	0.0627259	0	0
	0.19179	0.290406	0.271182	0.320768
	0	0.0792296	0.314672	0
	0.260941	0.305477	0.341571	0
	0.115687	0.645493	0.272234	0
	0.531975	0	0.372403	0
	0.409619	0	0.340535	0
	0.261183	0.195669	0.177202	0.0690602
	0.564911	0.252285	0.475512	0.0217957
	0.491254	0	0.0483574	0
	0.499696	0.264736	0	0.00366635
	0.558148	0.377512	0	0.38241
	0.0892774	0.321182	0.147015	0.505707
	0.536528	0.0775431	0	0
	0.126669	0	0	0
	0.485881	0.0731516	0.129837	0.0271688
	0.408719	0	0.464176	0
	0.0570426	0.0413485	0.389044	0
	0.43355	0.492984	0.0378238	0
	0.498725	0.508479	0.324598	0
	0.381122	0.0975579	0.0782986	0
	0.0518416	0.597934	0.149256	0
	0	0.398823	0.0325114	0.118919
	0.0483574	0.336167	0.0145844	0.460931
	0.35174	0.11903	0.107383	0.0217957
	0.475512	0.456499	0.389044	0
	0.432204	0.468166	0	0.128255
	0.358658	0.536063	0	0
	0.541309	0.499996	0.309066	0
	0.13613	0.0181968	0.462095	0.118693
	0	0.198958	0.324032	0
	0	0.11225	0.221236	0
	0.490387	0	0.441969	0
	0.43016	0.481388	0.292819	0
	0.544117	0.498219	0.180147	0.274357
	0.527143	0.5435	0	0.290448
	0.353734	0.184538	0.320291	0.137696
	0.371067	0	0.0673536	0.138721
	0.410398	0.525794	0.0253811	0.0200452
	0.492281	0.0467873	0.374917	0
	0.0539159	0.00549784	0.443831	0
	0.483666	0.311302	0.49013	0
	0.0501011	0.180147	0.402455	0
	0.174244	0.211646	0.159252	0
	0.300691	0	0.183078	0.150094
	0.454364	0.274706	0.499878	0.00183486
	0.0378238	0.498694	0.169782	0
	0.425678	0.312156	0	0.494991
	0.0378879	0.446391	0.462307	0.275937
	0	0.50582	0.579574	0.313461
	0.450398	0.452371	0.134562	0
	0	0	0.289257	0.0909403
	0.284461	0.249376	0.322416	0
	0.0181968	0.203218	0	0
	0.388178	0.329853	0.257117	0
	0.00183486	0.0342856	0	0.00914058
	0.459744	0.219954	0.00731921	0.028953
	0.35768	0.00366635	0.165289	0
	0.148556	0.22671	0.4992	0.194667
	0	0	0.312135	0.349828
	0	0.479779	0.449817	0
	0.019998	0.496468	0.0825923	0.00183486
	0.437506	0.599598	0.163785	0
	0.359764	0.558592	0	0
	0.324973	0	0.0842687	0
	0.469944	0.540515	0.118693	0
	0.398357	0.424271	0.384125	0
	0.232906	0	0.267873	0
	0.209488	0.0792296	0.458553	0.105754
	0.601875	0.292819	0.435004	0.438798
	0.145303	0.492542	0.0570426	0
	0.514486	0.435543	0.432418	0.386434
	0.201371	0.554878	0.0825923	0.140815
	0.477678	0.49922	0.127029	0
	0.165289	0.0707636	0.00366635	0.0570426
	0.350738	0.562034	0	0.0656435
	0.478406	0.52135	0.25455	0
	0	0.00366635	0.436855	0
	0.43355	0.522139	0.315788	0
	0.482885	0.347148	0.0909403	0.335307
	0.546055	0.614078	0.35768	0.47386
	0.382066	0.530906	0.430845	0
	0.147914	0.475512	0.389908	0.105754
	0.0554101	0.110631	0.478275	0.499086
	0.489716	0.37477	0.206041	0.445662
	0.616395	0	0.315788	0
	0.0342856	0.196165	0.0792296	0
	0.27839	0.482626	0.402744	0
	0.495527	0.354174	0.129837	0
	0.23353	0	0.421748	0
	0	0	0.301391	0
	0	0.282042	0.454917	0.295176
	0	0	0.274706	0.132265
	0.371067	0.39618	0.346698	0.0307339
	0.120241	0.146023	0.345679	0.0127732
	0.104122	0	0.394175	0.330255
	0.512253	0	0.552192	0.30489
	0.138586	0.0109586	0.444444	0
	0.1889	0.169782	0.178676	0
	0.459221	0.0775431	0.420952	0
	0.140954	0	0.35768	0
	0.429489	0.0553123	0.447494	0
	0.383793	0.498903	0.0431057	0
	0.00549446	0.392535	0.0639301	0.0587695
	0.491854	0.3205	0.33213	0.54222
	0	0	0	0.126669
	0.514353	0	0.310172	0.362972
	0.187631	0.0448596	0	0.461292
	0.516291	0	0.366362	0.205663
	0.459289	0.595755	0.466795	0.499595
	0.453949	0.168844	0.22814	0.488522
	0.563471	0.595665	0.109009	0.156213
	0.33636	0.49064	0.410844	0.019998
	0.0846313	0.434882	0	0.143922
	0.372925	0.476226	0.281361	0
	0.315168	0.196101	0	0.0307339
	0.58539	0.345755	0.382015	0.140815
	0.437375	0.00731921	0.492335	0.019998
	0.200381	0.428749	0.0943452	0.197531
	0.390768	0.0623246	0.499645	0.545463
	0.43016	0.438154	0.403995	0.238866
	0.0483574	0.00366635	0	0.481584
	0	0.443169	0.110631	0.0325401
	0.221785	0.319843	0.102486	0.37842
	0.0378575	0.265994	0.367309	0.404071
	0.408837	0.170627	0.0909403	0
	0.00731921	0.229493	0.11225	0.485257
	0.499187	0.382906	0.327941	0.50358
	0.110631	0.514247	0.299851	0
	0.465272	0.250674	0.0378238	0
	0.00914058	0.53073	0.340535	0
	0.454917	0.395858	0.0859416	0.0707636
	0.389908	0.313501	0.161873	0.0501011
	0.24546	0.534555	0.411643	0.118693
	0.176941	0.626952	0.0535786	0.157648
	0.410683	0.265994	0.00731921	0.107383
	0.0326211	0	0.168288	0.408592
	0.383933	0.0181968	0.00549446	0.25967
	0.137311	0.244097	0.234019	0
	0.134663	0.411704	0.449817	0.16679
	0.482602	0	0.478275	0.258395
	0.498532	0	0.148528	0.162277
	0.451548	0	0.0109586	0.198958
	0.147015	0.0217957	0.0925998	0.0501011
	0	0.306621	0.288731	0.232167
	0.434882	0.0378238	0.32221	0.102486
	0.130319	0.152793	0.478275	0.415758
	0.517937	0	0.379324	0.338608
	0.524285	0	0.476716	0.506524
	0.206041	0	0.370133	0.465754
	0.376602	0	0.213039	0
	0.00183486	0.388178	0.470736	0
	0.363498	0	0.252663	0
	0.344084	0	0.430845	0
	0.591621	0.0217957	0.169782	0.0825923
	0.0235901	0.0557069	0.252239	0.0746188
	0.394573	0.00549446	0.139257	0.229493
	0.0518416	0.282614	0.0604931	0.274706
	0.0109586	0	0	0.217411
	0.358658	0	0.123489	0.33636
	0.248074	0.415002	0.2685	0
	0.488242	0.0604931	0.464786	0
	0.213039	0.244148	0.264736	0.11225
	0.418422	0.579841	0.0604931	0
	0	0.185996	0	0
	0.412716	0.484739	0	0.197531
	0.60842	0	0.15225	0
	0.49013	0	0.372814	0
	0.175725	0.380224	0.391625	0
	0	0.341571	0.342603	0.443831
	0.543055	0	0.325684	0.0622133
	0.0483574	0	0.397463	0.267132
	0.459744	0.499736	0	0.290448
	0.181614	0	0.0483574	0
	0.118693	0.35768	0	0
	0.269748	0.5	0.229493	0.0413485
	0.477212	0.00731921	0.0570426	0.270993
	0.291635	0.0825923	0	0.148556
	0.487672	0.17276	0	0.110631
	0.376602	0.376106	0	0.440711
	0.475138	0.425086	0.0992039	0.510715
	0.244957	0.269057	0.0842687	0.113866
	0.335307	0.263475	0.504787	0
	0.303663	0.548946	0.30271	0.0217957
	0	0.240446	0.0378238	0.284461
	0.25455	0.427388	0.0975579	0.32132
	0.271485	0.569127	0.0535786	0.197531
	0.495868	0.219954	0	0
	0.234869	0.455467	0.0217957	0.143922
	0.0378238	0.51485	0.188551	0.0109586
	0.242832	0.284461	0.568099	0
	0.302169	0.289257	0.303322	0.00183486
	0.513791	0.203218	0.338454	0.481786
	0.139257	0	0.486957	0.379324
	0.0809885	0.328538	0.104122	0.467525
	0.419404	0.328922	0.347713	0.465208
	0.0379755	0.0431057	0.115478	0.515168
	0.125081	0.157734	0.395858	0.463309
	0.19323	0.239945	0.456393	0.100847
	0	0.0775431	0.391625	0
	0	0	0.539065	0.197531
	0.0622133	0	0.499996	0.177202
	0.315576	0.0413485	0.453808	0.0501011
	0.526622	0	0.499291	0.0570426
	0.480051	0.356698	0.305619	0
	0.538157	0.14848	0.384677	0.58061
	0.270993	0.0570426	0.443213	0.178487
	0	0.448293	0.0217957	0
	0.0608725	0.457096	0.567943	0.0909403
	0.104122	0.230842	0.432204	0.440711
	0.432879	0	0.37842	0.263606
	0.479408	0.306304	0.17276	0.367173
	0.487958	0.437506	0	0.323509
	0.238866	0.340535	0.107383	0.107383
	0.420654	0.0271924	0	0.218578
	0.284461	0.14547	0.0673536	0
	0.456557	0.244148	0.21025	0.272234
	0.49403	0.00183486	0.286677	0.414461
	0.291723	0.201801	0.241514	0.397527
	0	0.219954	0.403265	0.337114
	0.397527	0.482966	0.0360564	0
	0.16679	0	0	0.019998
	0.157734	0.371998	0.46765	0.19557
	0.151629	0.241514	0.456557	0.371067
	0.420952	0.0483574	0.475917	0.137937
	0.250674	0.181351	0.5557	0
	0.54123	0.174592	0.235183	0
	0.378201	0.334252	0.483729	0
	0.0145844	0.226784	0.423077	0.125081
	0.378803	0.0518416	0	0.475104
	0.411174	0.0859416	0.16679	0.129837
	0.0825923	0.265869	0.0109586	0
	0.475806	0.329128	0	0.283253
	0.258395	0.49005	0	0.479779
	0.0145844	0.159596	0	0.296438
	0.541959	0.493412	0	0.494441
	0.520176	0.0710587	0.00731921	0.425981
	0	0.23353	0	0.278346
	0.162598	0.267448	0	0.15316
	0.104122	0.441969	0	0
	0.570903	0.437506	0.221327	0.109009
	0.325808	0.0851794	0.230842	0.35853
	0.0909403	0.350738	0.334252	0.413481
	0.499389	0.0604931	0.248074	0.292819
	0.230184	0.37842	0	0
	0.43355	0.468259	0.293999	0.347713
	0	0.00549446	0.349135	0.405673
	0.482626	0	0	0.317336
	0.393517	0.13613	0.499541	0.00183486
	0.0758533	0.492542	0.207447	0.638935
	0.17276	0.0145844	0.349733	0.476266
	0.316901	0	0	0.239186
	0.200381	0.226784	0.348705	0
	0.19323	0.102486	0.210174	0
	0.398357	0.0690602	0.313552	0.391625
	0.458402	0.218578	0.531307	0.0235901
	0.264736	0	0.465754	0.612024
	0.226784	0	0.257117	0.475472
	0.213039	0.25967	0.46765	0.46596
	0.255835	0.457633	0.17442	0
	0.47833	0.0483574	0.282042	0
	0.0892774	0.386252	0	0
	0.261628	0.309039	0.514149	0.0127732
	0.00183486	0.134233	0.0690602	0.337409
	0	0.415002	0.33636	0.402455
	0	0	0.458695	0.0959086
	0.196101	0.548536	0	0.0127732
	0.196101	0.0892774	0	0
	0.392114	0.552947	0	0
	0.479034	0.00183486	0.00183486	0.0942559
	0	0.00183486	0.219954	0.286866
	0.306762	0.148556	0	0
	0.169782	0	0.402455	0
	0.311225	0.425981	0.458165	0
	0.227158	0.355713	0.393547	0.436236
	0.424561	0.288559	0	0.433042
	0.456014	0.0992039	0.462183	0.509811
	0.496509	0.0413485	0.311737	0.405936
	0.400969	0.33213	0.222696	0
	0.521031	0.27839	0.169249	0.329995
	0.406256	0.315029	0.27839	0.0775431
	0.168288	0.241724	0.431982	0.56264
	0	0.366331	0.311302	0.0868017
	0.498725	0.325958	0.00549446	0.423128
	0.396694	0.545023	0	0
	0.0342856	0.224376	0	0.0163923
	0.229493	0.390505	0	0.332019
	0.415002	0.140815	0	0.125066
	0.028953	0.267249	0	0.0639301
	0.517299	0.366362	0	0.131415
	0.299148	0.501254	0	0.22814
	0.229294	0.213039	0	0
	0.0622133	0.471586	0.317458	0.374639
	0	0.530234	0.0656435	0.461292
	0.0909403	0.599042	0.395858	0.26221
	0.275374	0.51625	0.0448596	0
	0	0.43614	0.211646	0
	0.481584	0.362537	0.0483574	0
	0.187449	0.441174	0.11225	0
	0.00183486	0.270993	0.449548	0
	0.0164159	0.128255	0.0919977	0
	0.23353	0	0.496353	0
	0.613962	0	0.00183486	0
	0.591559	0.00366635	0.21326	0
	0.203218	0.00366635	0.27839	0.11225
	0.570827	0	0.165728	0.429276
	0.0758533	0.447913	0.519905	0.551226
	0.492542	0	0.37844	0.247109
	0.151629	0.0553123	0.191308	0.428781
	0	0.423846	0.551909	0.11225
	0.475512	0	0.472526	0
	0.228717	0	0.601871	0.294934
	0.167402	0.13613	0.256702	0.173114
	0.0325114	0.400138	0.327846	0.564871
	0.107383	0.0707636	0.421266	0.584627
	0.213039	0	0.508995	0.221543
	0	0.418746	0.0217957	0.448057
	0.237537	0.51625	0	0
	0.457693	0.547244	0	0.137696
	0.575124	0.431536	0.273472	0.198958
	0.261803	0.424221	0.00549446	0.27839
	0.466795	0.116966	0.16679	0
	0.236205	0.125288	0.307187	0.0181968
	0.219954	0	0.301922	0
	0	0.356698	0.314166	0
	0.222673	0	0.584481	0.286866
	0.40539	0	0.165289	0.019998
	0.147015	0.110631	0.349231	0
	0.468115	0.498107	0.538233	0.121893
	0.00366635	0.41651	0.355713	0
	0.583546	0.392478	0.574976	0
	0.0622133	0.168288	0.313552	0.304472
	0	0	0.462248	0.0271688
	0.0217957	0	0.38153	0.00731921
	0.453248	0	0.0483574	0.279611
	0.248074	0.123489	0.213039	0.00731921
	0.280828	0.0518416	0	0.00549446
	0.0145844	0.340535	0	0.213495
	0.548212	0.53281	0	0.0555956
	0.536488	0.356799	0	0.365411
	0.477502	0.415758	0	0.17699
	0.0942559	0.447362	0.339496	0.00366635
	0.461559	0.4782	0.121686	0.00183486
	0.531863	0.121893	0.102857	0.2685
	0.100943	0.489223	0	0
	0.151629	0.351565	0	0.443213
	0.14237	0	0.207447	0.282042
	0.522595	0.366362	0.0942559	0.171273
	0	0.243861	0	0.244148
	0.30143	0.492766	0.321664	0.32022
	0.0622133	0.159252	0.419536	0.466233
	0.028953	0.147015	0.447463	0.428781
	0	0	0.168288	0
	0.411147	0	0.248074	0
	0.131415	0	0.221327	0.237537
	0.232187	0	0	0.270993
	0.485193	0	0.00183486	0.0163923
	0.615562	0.49064	0.455133	0
	0.356998	0	0.258356	0.370598
	0.459744	0	0.374335	0.405452
	0.47789	0	0.320698	0.0271688
	0.282042	0	0.454229	0.123489
	0.279492	0	0.242257	0
	0.360604	0	0.178062	0.0992039
	0.238977	0	0.272234	0.337409
	0.328922	0	0	0.447463
	0.452863	0	0	0.499966
	0.262493	0.334252	0.214429	0.340535
	0	0.131415	0.175725	0.0181968
	0	0.30745	0.0253811	0.0741601
	0.429513	0.0163923	0.25455	0.327846
	0.329803	0.00914058	0.362537	0.392478
	0.571539	0.479607	0	0.00183486
	0.0502276	0	0.492984	0.00914058
	0.140815	0.196101	0	0.00183486
	0.157375	0	0.369475	0.0163923
	0.271524	0.437113	0.102486	0.224062
	0	0	0.52916	0
	0.279611	0	0.533929	0.028953
	0.281137	0	0.105754	0.491378
	0.535391	0.445055	0	0
	0.156213	0.00366635	0	0.595588
	0.453248	0.289257	0	0.434127
	0.222696	0.187449	0	0.230842
	0.458165	0.0711531	0.204631	0
	0.0413485	0	0.131415	0.179783
	0.293999	0	0.214429	0.282252
	0.00366635	0.00914058	0.162277	0.375421
	0.57592	0.00731921	0.107383	0.0724635
	0.426686	0.454917	0	0
	0.284461	0.556998	0.494424	0
	0.45611	0.451936	0.0775431	0.411511
	0	0.499458	0.357963	0.323509
	0	0.11225	0.0163923	0.0724635
	0	0.271047	0.00183486	0.13299
	0.187449	0.499777	0.53951	0.141984
	0.371067	0.301012	0.383793	0.257009
	0	0.556742	0.336866	0.391689
	0.130435	0.525489	0.338535	0.246769
	0.0975579	0	0.113866	0.293999
	0.497369	0	0.277165	0.0639301
	0.441341	0.292819	0.128255	0.377386
	0.523252	0.0909403	0.137696	0.113866
	0.345679	0.237006	0.494627	0
	0.104122	0	0.246769	0
	0.0360564	0	0	0.215815
	0.260328	0	0	0
	0.147015	0.32132	0	0
	0.367308	0	0.00731921	0.257633
	0.0842687	0.525853	0.104122	0
	0	0.505413	0.219954	0.0397497
	0.159252	0	0.0342856	0.456995
	0.00366635	0	0.0792296	0.390768
	0.46847	0	0.0325114	0.371998
	0.0109586	0	0.414243	0.0604931
	0	0	0.104122	0.00366635
	0.381122	0	0.0413485	0.368254
	0.212719	0	0.468166	0.0947416
	0.395372	0.241514	0.0448596	0.51029
	0.414243	0.0842687	0.456192	0.00914058
	0.484295	0.0809126	0.411174	0
	0.411946	0.206041	0.137696	0
	0.224062	0.538076	0	0.48451
	0.0825923	0.305619	0	0.175695
	0.0587695	0	0	0.475512
	0	0.491073	0.16679	0.403265
	0	0.244148	0.164266	0.492087
	0.312429	0	0.341571	0.360489
	0	0.0809126	0.383012	0.0690602
	0.455467	0.527426	0.28594	0
	0.48554	0	0.293133	0
	0	0.0909403	0	0
	0.505044	0.467731	0.352739	0
	0.499541	0.019998	0.353734	0
	0.490802	0.0395878	0.533432	0
	0.429674	0.145075	0	0.496509
	0.358658	0.0713555	0.0859416	0.0975579
	0.0825923	0.339496	0.280828	0.229493
	0.224438	0.456961	0.500045	0.402516
	0.516706	0.16679	0.166193	0.454617
	0.402735	0	0.170915	0.412716
	0	0.00549446	0.536088	0.14547
	0.290448	0.499645	0.0181968	0.120295
	0.203218	0.528342	0.481277	0.028953
	0.152725	0.401145	0.222696	0.482626
	0.362496	0.178676	0.411174	0.107383
	0.356877	0.564301	0.307374	0
	0.298644	0.368428	0	0
	0.194667	0.547112	0	0.466709
	0.19179	0.48643	0.205454	0.328922
	0.241514	0.162277	0.0395878	0.0217957
	0.121893	0.0109586	0.13613	0.249376
	0.337409	0.577721	0.0163923	0.234869
	0.0604931	0.424561	0.0109586	0.370067
	0	0.197531	0.222696	0.350738
	0.00549446	0.200381	0.366362	0.144337
	0.441412	0.284461	0.244148	0.0289783
	0.344657	0.121893	0.26221	0
	0.20885	0.408051	0.215815	0
	0.156213	0.248074	0.180147	0.334252
	0	0.0360564	0.0271688	0
	0.232187	0.468578	0.123489	0.25197
	0.464297	0	0.375114	0
	0.156213	0	0.277595	0
	0.356486	0	0.434882	0.178676
	0.0181968	0	0.0466102	0.030852
	0.14547	0	0.0181968	0.451548
	0.0217957	0	0	0.19179
	0.415758	0.366362	0.019998	0
	0.311312	0.0741601	0.117087	0
	0.388577	0	0.113178	0
	0.330897	0.560211	0.39135	0
	0	0.361572	0	0.0325114
	0	0	0.427364	0.181978
	0.504755	0.265994	0.0775431	0
	0.318035	0.203427	0.312429	0
	0.322998	0.476045	0.487564	0
	0.437068	0.0466102	0.35257	0.00549446
	0.602357	0.110631	0	0.00731921
	0.249856	0.553609	0.174244	0.113866
	0.184538	0	0.403265	0.00914058
	0.428086	0.425543	0.429943	0.131415
	0.0413485	0.0342856	0.348674	0.137696
	0	0.242832	0.453248	0.323509
	0	0.0639301	0.328933	0
	0	0.115478	0	0.310429
	0	0.123489	0.193321	0
	0	0.303241	0.264736	0
	0	0.372207	0.129837	0.447463
	0.25967	0.018212	0.0925998	0.0604931
	0.202111	0.240191	0.271205	0
	0.161275	0.473969	0.137696	0
	0.431526	0.499008	0.14237	0
	0.0518416	0.581209	0.372925	0
	0.489608	0.479408	0.105754	0
	0.496809	0.281108	0.0218143	0.414243
	0.321161	0.108867	0.35174	0.318011
	0.28862	0.0413485	0.174885	0.217198
	0.371998	0.352739	0.375688	0.13652
	0.362537	0.196101	0.350394	0
	0	0.422399	0.125081	0
	0.0925998	0.389044	0.019998	0
	0.0859416	0.24546	0	0.16679
	0.244148	0	0	0.487032
	0.432204	0.0163923	0.028953	0.471279
	0	0.257117	0.463063	0.381852
	0	0.0876939	0.493412	0.0466102
	0.276037	0.219839	0.240191	0.426686
	0.00183486	0.0518416	0.394175	0.00731921
	0.211739	0.349733	0	0
	0.247548	0	0	0.134562
	0.067416	0	0.285665	0.603632
	0.160766	0	0.0639301	0.0992039
	0.185996	0	0.19179	0
	0.306762	0	0.345544	0.0127732
	0.190347	0	0	0.0553123
	0.497628	0	0	0.0483574
	0.0570426	0	0.236205	0
	0.00183486	0	0.384677	0
	0.125081	0.23271	0.379789	0
	0	0.108112	0.0378238	0
	0	0	0.288063	0.125081
	0.454607	0.168288	0.204631	0
	0	0	0.144721	0.0501011
	0.450398	0.476109	0.494424	0.434882
	0.100847	0	0.284496	0
	0.422143	0.169782	0.090151	0
	0.163785	0.0360564	0.0109586	0.159252
	0.0360564	0	0.269951	0.134562
	0.455467	0.153433	0.174244	0.0876112
	0.228378	0.359633	0.516065	0.479182
	0.106614	0.028953	0.469957	0.494728
	0.028953	0.273472	0.306762	0.218578
	0	0.418004	0.17276	0.00183486
	0.25967	0.385557	0.00549446	0.19179
	0.481229	0.168288	0.418787	0
	0.201685	0.467181	0	0
	0	0.56892	0.00549446	0.180147
	0	0.560182	0.267249	0.433914
	0.00183486	0.491854	0.0342856	0.141762
	0.0724635	0.441969	0.304472	0.33159
	0.29635	0.428781	0.499187	0.202064
	0.19023	0.440653	0.230842	0.0942559
	0.0360564	0.427206	0.0724635	0.242832
	0.498327	0.410395	0.151629	0.221327
	0.518927	0.17442	0.115478	0
	0.37842	0	0.343632	0
	0.249376	0	0.0163923	0
	0.0707636	0	0.118293	0.495868
	0	0	0.553973	0
	0	0.428086	0.261061	0
	0	0.473438	0.0145844	0.445055
	0	0.410398	0.120578	0
	0	0	0	0.389908
	0.139257	0.151629	0	0.232167
	0.224062	0.240191	0.323509	0.198958
	0.323823	0.407106	0	0.289598
	0.303322	0.616264	0.0518416	0
	0.00549446	0	0.100847	0.272234
	0.00549446	0.20885	0.19323	0
	0.0693469	0	0.0758533	0.292819
	0.337409	0	0.459221	0.531863
	0.200551	0	0.354725	0.229911
	0.457096	0	0.280828	0.00549446
	0.394175	0.0729492	0.0271688	0.311169
	0.102486	0.367401	0.244148	0.107383
	0.283253	0	0.52162	0
	0.0307339	0.0127732	0.454917	0
	0	0	0.0109586	0
	0.480511	0	0.213039	0.105754
	0.16679	0	0.457633	0.0217957
	0	0	0.515162	0.287532
	0.028953	0	0.362537	0.0325114
	0.232532	0.0690602	0.530454	0
	0.221327	0.61336	0	0.0869333
	0.323468	0	0.377054	0
	0.102223	0.00183486	0.559857	0
	0.0748971	0.11225	0.412935	0.304992
	0.350915	0.467286	0.163785	0.0163923
	0.0235901	0.206041	0.0690602	0
	0.282042	0.0741601	0.213609	0
	0.31453	0.0466102	0.307834	0.162277
	0.322416	0.11225	0	0.00731921
	0.253234	0.584855	0.197409	0.367309
	0.214429	0.499966	0.0271688	0.447693
	0	0.414658	0	0.253261
	0.183078	0.497875	0	0.376602
	0.19179	0.458105	0	0.272153
	0.104122	0.419222	0.0466102	0
	0	0	0.16679	0
	0.100847	0	0.265994	0.0758533
	0	0	0.00183486	0.213203
	0.528152	0	0.400826	0.350536
	0.550823	0	0.463805	0.652524
	0.222929	0.36537	0.130435	0
	0.498431	0.394175	0	0.0448596
	0.493827	0.207447	0.16679	0.0181968
	0.516382	0.0859416	0.0555956	0.194667
	0.566439	0.204631	0.225425	0.128255
	0.475917	0.125081	0.0975579	0.121893
	0.151629	0.187449	0.00183486	0.0413485
	0.00731921	0.339451	0.293999	0.51226
	0	0.257081	0	0.453762
	0	0.0181968	0	0
	0.313552	0.450904	0.184538	0
	0.240112	0	0	0
	0.401642	0	0	0.0959086
	0.312429	0	0.0325114	0.135554
	0	0	0.354558	0
	0	0.0431057	0.131415	0
	0	0.11225	0.202924	0
	0	0	0.492765	0
	0.43355	0.224062	0.285665	0.282095
	0.564041	0.171273	0.345547	0.530565
	0.430287	0	0.019998	0.115478
	0.0604931	0.222696	0.200381	0.585622
	0.137696	0.1889	0.36626	0.147814
	0.0466102	0	0.501477	0.490444
	0	0.321596	0.0690602	0.570478
	0	0	0.244148	0.440077
	0.120295	0	0	0.385557
	0.248074	0.313921	0.419191	0
	0	0.202334	0.140815	0.37477
	0	0.291868	0.217198	0.100847
	0.27839	0.411774	0.214429	0
	0.29635	0.25967	0.537226	0
	0	0	0.400006	0.440711
	0	0.436201	0	0
	0	0.498725	0.427388	0.365411
	0.358682	0.577961	0	0.0109737
	0.0271688	0.514378	0	0
	0.0253811	0.578948	0.449234	0.392134
	0.400092	0.499541	0.517982	0.0741601
	0.00183486	0.486791	0.0307339	0.222696
	0.42592	0.0741601	0.129837	0.206258
	0	0	0.498357	0
	0.14237	0	0.328922	0.1889
	0.1889	0	0.215815	0.250674
	0.0253811	0.610462	0.030852	0.33213
	0.482626	0.060601	0	0.00183486
	0	0	0	0
	0.372043	0	0	0.466233
	0.405295	0	0.487958	0.536417
	0	0	0	0.21025
	0.187449	0.508413	0	0.496762
	0	0.241514	0	0.196101
	0	0.509811	0.157734	0.0724635
	0.0449372	0	0	0.0587695
	0.0271688	0.237788	0.298688	0
	0	0	0	0.369036
	0.386518	0	0.0639301	0.352739
	0.027243	0.38455	0.102769	0.151629
	0.383017	0.353177	0.168441	0
	0.00183486	0	0.261785	0
	0	0	0.128255	0.331078
	0	0	0	0.0673536
	0.0378238	0	0	0
	0.424561	0	0.364456	0.00366635
	0	0.00549446	0	0.0395878
	0.16679	0.0431057	0	0.483638
	0	0	0	0.368547
	0	0	0	0
	0.397527	0.194667	0	0.23353
	0.290001	0.174244	0.0109586	0.22814
	0.202793	0.0325114	0.440785	0
	0.496809	0.419485	0.00914058	0.328922
	0.490741	0.0942559	0.139257	0
	0.479034	0.126669	0	0
	0.0992039	0.44496	0.140815	0.289257
	0.16679	0.11225	0.393328	0.388178
	0.396694	0.644739	0.200513	0.123489
	0	0.479408	0.0325114	0.394623
	0	0.499069	0.0886383	0.0792296
	0.0959086	0.49922	0.354558	0.408837
	0.400826	0.358388	0.438798	0.419667
	0.318011	0.543207	0	0
	0.450974	0.53272	0.360604	0.490426
	0.255835	0.23353	0.147015	0.0518416
	0	0	0.503619	0.37842
	0.233559	0.457633	0.485041	0
	0.29635	0.356698	0.154612	0
	0.0909403	0.0342856	0.530482	0.215815
	0.498431	0	0.211272	0.154688
	0.533573	0	0.403265	0.0587695
	0.395338	0	0.176349	0.0468885
	0	0	0.390768	0.391625
	0	0.258975	0.187449	0.129837
	0	0	0	0
	0.00549446	0.0639301	0.283253	0
	0.185996	0.308685	0.00731921	0.0127732
	0.206041	0	0.0181968	0
	0.102486	0.458695	0	0
	0	0	0	0.14237
	0	0.0235901	0.0413485	0.118693
	0.276725	0.476025	0.309373	0.0127732
	0.431526	0.207559	0.209066	0.325684
	0	0	0.0656435	0.123924
	0	0	0.0448596	0.520328
	0	0	0	0.0676318
	0.0127901	0	0	0.00731921
	0.459221	0.0724635	0	0.569279
	0.0775431	0.269748	0.263475	0.403776
	0.13693	0.337802	0.508894	0.239672
	0.337409	0	0.0448596	0
	0.441594	0	0	0.0127732
	0.280828	0.0809126	0	0.165289
	0	0	0	0.113866
	0.47386	0	0.171273	0.147015
	0.21025	0	0	0
	0.206041	0	0.2685	0.168288
	0.454567	0	0.313552	0.557909
	0.219954	0.336205	0.285665	0
	0.0536731	0.264736	0.0200283	0
	0.0181968	0.25967	0.432204	0
	0	0.479322	0.492583	0
	0	0.495294	0	0
	0	0.496003	0.0758533	0.292819
	0	0.465272	0.325684	0.446866
	0	0.240333	0.177202	0.160766
	0.358658	0.028953	0	0.162277
	0	0.57039	0.0975579	0.0656435
	0	0.131415	0.0604931	0
	0.206041	0.217198	0	0.367535
	0.225425	0	0.322416	0.485914
	0	0	0.00366635	0.426118
	0.365411	0.140574	0.00366635	0.360604
	0	0	0	0.0825923
	0	0.303322	0.280373	0.583767
	0	0.125081	0	0.289257
	0.143922	0	0	0
	0.238866	0.305427	0.224297	0.14237
	0.500758	0.0501011	0.465824	0
	0.348725	0.288063	0.286845	0.450398
	0	0.0809126	0.219954	0.368254
	0.128255	0.0896653	0.291635	0
	0	0.100943	0.356354	0.0109586
	0	0.00183486	0.132731	0.486188
	0	0	0.196102	0
	0.0271688	0.427954	0.0307339	0
	0.4975	0.108457	0	0.100847
	0.529293	0	0.153815	0.0859416
	0.488798	0	0.356769	0.0109586
	0.290448	0	0.162277	0.0793038
	0.0360564	0	0	0.342603
	0.47789	0	0.521026	0.260132
	0.0587695	0	0.129837	0.0253811
	0.310172	0	0.0622133	0.248074
	0.343632	0.0909403	0.0271688	0.305619
	0.148556	0.289257	0.363498	0
	0.366362	0	0.00366635	0.492087
	0.19323	0	0	0.00183486
	0.482966	0	0.376602	0.0959086
	0.129351	0.074661	0.242272	0
	0.0307339	0.584288	0	0.226491
	0.508661	0.357757	0	0.178676
	0.542488	0.584761	0.337127	0
	0.294721	0.0959086	0	0
	0	0.122143	0.24546	0.0181968
	0	0.4975	0	0.0362183
	0	0	0.258395	0.243657
	0	0.532076	0.0395878	0
	0	0.432204	0.432879	0.221853
	0.0658661	0.257666	0.288063	0.224696
	0.464286	0.51241	0.477111	0.499423
	0	0.49403	0.552121	0
	0.117087	0.292819	0	0.0604931
	0.399183	0.0622133	0.0271688	0.225425
	0.323202	0.418746	0.0253811	0.251029
	0.0181968	0	0.483304	0.242832
	0	0.452118	0	0.419485
	0.249376	0.218578	0	0.454644
	0.0724635	0.525701	0.240191	0.249856
	0.343632	0.0431057	0.405673	0.123489
	0.108943	0.33213	0.0724635	0.103943
	0.497942	0.0326329	0.111304	0.414523
	0.213692	0.527305	0.0501011	0.526462
	0.115478	0	0.295072	0.256381
	0.333193	0.257117	0.315788	0.115478
	0.341571	0.00366635	0.117087	0
	0.0570426	0	0.0859416	0.217198
	0	0	0	0.436641
	0.328922	0	0.162277	0.539065
	0.472537	0.0431057	0.0975579	0.107383
	0.521606	0.325335	0.359633	0.0127732
	0.100847	0.203218	0	0
	0.0656435	0.394175	0	0
	0	0.279611	0.363498	0
	0.028953	0.296421	0.428369	0.110631
	0.107383	0.159839	0.190347	0.328922
	0	0	0	0.108112
	0.0775431	0	0.187449	0.0448596
	0.0792296	0	0.184538	0.113866
	0	0	0.0395878	0.43016
	0.177202	0.00549446	0	0.0707636
	0.295176	0	0.392478	0.293999
	0.222696	0.0892774	0.579745	0.00549446
	0	0.104122	0.200754	0
	0.443831	0.0501011	0	0
	0.494616	0.382906	0.234869	0
	0	0.105754	0.0535786	0.338454
	0	0	0.419303	0.0809126
	0.275937	0	0.0673536	0.15812
	0	0.270993	0.318733	0
	0.515765	0.250573	0.363174	0.417633
	0.372865	0.175401	0.0145844	0.50688
	0	0.373441	0.367309	0.386434
	0	0.573716	0.0909403	0.172234
	0	0.0879215	0	0
	0	0.157734	0.129837	0
	0.257117	0.211646	0.398357	0.37842
	0.242832	0.2666	0.556209	0
	0.0181968	0.465754	0.0271688	0
	0.165775	0.585022	0	0.480511
	0.218578	0.467389	0.00183486	0.393743
	0.263475	0.497234	0.290448	0.187449
	0.297119	0.493621	0.389578	0
	0.0846313	0.48301	0.134562	0.0163923
	0.274706	0.482282	0.0501011	0.407262
	0.37385	0.0253811	0.280828	0.246769
	0.257117	0	0.362537	0.113866
	0.0639301	0.454364	0.316901	0.0271688
	0.171273	0.0501011	0.104122	0.14547
	0.389434	0.454659	0.0109586	0
	0.454917	0.0501011	0	0.00731921
	0.484503	0.00183486	0.0859416	0.0253811
	0.376602	0.0842687	0.00914058	0.542286
	0.0902522	0.00914058	0.32022	0
	0.297591	0.498033	0.129837	0
	0	0.43099	0	0
	0	0.00549446	0	0
	0	0.206041	0	0
	0	0	0.499595	0.174244
	0	0	0.425273	0
	0.0909403	0.00549446	0.00183486	0.0622133
	0	0.0360564	0.26221	0.346698
	0	0.134562	0.465272	0.41568
	0.0395878	0.195436	0.252285	0.47789
	0.365761	0.48909	0.465856	0.0127732
	0.137696	0.334838	0.288063	0.0145844
	0	0.304	0.35174	0
	0.0253811	0	0	0
	0	0	0	0
	0.0127732	0	0.0483574	0.120295
	0.494525	0	0.292819	0.0942559
	0.0518416	0	0	0.00549446
	0.220183	0.264736	0	0.0587695
	0.163785	0.282042	0	0
	0.498327	0.0975579	0.453248	0
	0.469036	0.0829465	0.00549446	0
	0.224062	0.378733	0	0.492542
	0	0.42022	0	0.019998
	0.241514	0.381122	0.414243	0.11225
[truncated: 133,965 more rows]

## Sheet: consist
	3502	3503	3504	3505	3506
mean	0.175614	0.185804	0.204206	0.212442	0.24971
std	0.195308	0.187413	0.18754	0.185615	0.19705

## Sheet: Annual
	1980	1981	1982	1983	1984	1985	1986	1987	1988	1989	1990	1991	1992	1993	1994	1995	1996	1997	1998	1999	2000	2001	2002	2003	2004	2005	2006	2007	2008	2009	2010	2011	2012	2013	2014	2015
3502	0.562127	0.562127	0.562127	0.363602	0.363602	0.341071	0.341071	0.29075	0.29075	0.300076	0.300076	0.297613	0.291643	0.291643	0.295782	0.295782	0.295782	0.295782	0.295782	0.306187	0.306187	0.312877	0.316882	0.317297	0.319101	0.319101	0.316644	0.314067	0.312709	0.312709	0.312709	0.312709	0.312709	0.312709	0.312709	0.312709
3503	0.445045	0.445045	0.445045	0.43047	0.427074	0.424775	0.414169	0.409583	0.398364	0.390744	0.390683	0.384753	0.374987	0.333111	0.333069	0.333069	0.333631	0.331045	0.323109	0.319926	0.319926	0.321378	0.324196	0.323926	0.322646	0.322407	0.323864	0.324618	0.324372	0.322479	0.322196	0.323355	0.324896	0.323836	0.318863	0.318563
3504	0.473655	0.473655	0.473655	0.447898	0.434061	0.422639	0.415008	0.407604	0.403175	0.398257	0.397071	0.395701	0.388106	0.367962	0.366507	0.36692	0.365912	0.359885	0.360352	0.35924	0.3594	0.360397	0.362255	0.360949	0.357206	0.356722	0.357911	0.358663	0.358398	0.35684	0.356612	0.357428	0.358992	0.357509	0.354776	0.354659
3505	0.483312	0.483312	0.483312	0.467081	0.458863	0.456426	0.450348	0.447374	0.445127	0.437224	0.433714	0.431844	0.42912	0.424455	0.424286	0.424141	0.42214	0.418862	0.411877	0.407848	0.407822	0.409311	0.410156	0.408253	0.40382	0.403331	0.404904	0.405734	0.404827	0.402723	0.402356	0.403088	0.404291	0.401017	0.398801	0.398563
3506	0.494762	0.494762	0.494762	0.486279	0.483305	0.481735	0.477887	0.473271	0.469136	0.465565	0.463806	0.461922	0.459047	0.44726	0.445391	0.445403	0.44397	0.439457	0.428769	0.427282	0.42722	0.428503	0.429516	0.428222	0.42436	0.423961	0.426732	0.427429	0.426282	0.423229	0.42303	0.423805	0.424195	0.419663	0.412542	0.412204
