# Supplementary material for: Cropland heterogeneity changes on the Northeast China Plain in the last three decades (1980s–2010s)
Source: PeerJ journal article supplement (doi:10.7717/peerj.9835), 2020-09-08
Supplement: CountyNew.zip [file results.xlsx]

## Sheet: county
RID	bias	mean	slope	Area	Type
1001	0.00575238	0.554549	-1.11671e-05	-178.737	3
1002	0.000979823	0.552713	5.3931e-05	11.628	1
1003	0.0680086	0.545835	7.88977e-05	-98.5023	2
1004	-0.0116522	0.544801	-1.64993e-05	16.7859	4
1005	-0.0141124	0.550346	-0.000199148	81.567	4
1006	0.00309519	0.547324	0.000150238	-39.9339	2
1007	0.00160422	0.550449	4.90497e-05	-56.5137	2
1008	0.00137262	0.555187	5.0298e-05	-32.1228	2
1009	0	0.558139	-1.41757e-18	-3.3975	3
1010	-0.00601185	0.545142	-6.31168e-05	38.4435	4
1011	-0.00943071	0.555028	-6.37522e-05	14.9004	4
1012	-0.00613679	0.544866	-9.38423e-05	-19.7244	3
1013	-0.00664293	0.548296	-0.000195852	43.2189	4
1014	-0.00141915	0.549677	-3.86651e-05	25.0389	4
1015	0.00794211	0.546716	3.57033e-05	4.8861	1
1016	-0.000244604	0.544981	-1.67282e-05	-13.6323	3
1017	0.0016713	0.551106	3.22915e-05	2.3004	1
1018	-0.00149979	0.547695	-1.21594e-05	21.7557	4
1019	-0.000583743	0.551469	-4.54781e-05	33.975	4
1020	0.00464801	0.540227	0.000136358	0.3195	1
1021	0.00193323	0.545247	5.25776e-05	8.883	1
1022	0.000934114	0.54448	6.97154e-06	8.3025	1
1023	-0.0128117	0.545237	-0.000113385	20.7585	4
1024	-0.00977655	0.55516	-1.73075e-05	70.3665	4
1025	0.00329866	0.549318	5.0953e-05	19.4805	1
1026	-0.00402174	0.54299	-5.489e-05	89.478	4
1027	0.00424255	0.555361	0.000235579	-27.0495	2
1028	-0.00245613	0.550108	3.96348e-05	8.0163	1
1029	0.00146767	0.547813	1.27443e-06	3.2859	1
1030	0.005228	0.544204	-4.46866e-05	36.6813	4
1031	-0.00302856	0.560914	-8.0117e-05	30.9483	4
1032	-0.00341245	0.551805	4.17204e-05	13.9068	1
1033	0.00447304	0.549334	0.000168705	-22.5171	2
1034	-0.0100648	0.558158	2.95246e-05	10.1916	1
1035	0.00566954	0.564485	0.000176966	-8.1765	2
1036	-0.00197938	0.56854	-4.37627e-05	-9.3312	3
1037	-0.00720711	0.554577	-6.64517e-05	88.7814	4
1038	-0.00180953	0.55562	-9.01458e-06	180.092	4
1039	0.00508755	0.553555	-1.91193e-05	-8.847	3
1040	-0.000919262	0.545635	-7.47622e-05	17.9262	4
1041	-0.00123464	0.556931	-0.000118728	-5.0679	3
1042	-0.0193941	0.544102	-5.92277e-05	-2.7306	3
1043	-0.00956098	0.554749	-4.53417e-05	50.9598	4
1044	0.00978363	0.553003	0.000106793	-1.674	2
1045	-0.00330163	0.550034	2.48368e-06	-11.4219	2
1046	0.000711655	0.55382	1.01993e-05	59.5611	1
1047	-0.00612064	0.548979	-5.75931e-05	40.0662	4
1048	-0.0168831	0.540705	-0.00049206	0.4734	4
1049	-0.00115488	0.549774	-2.45743e-05	7.8138	4
1050	0.0160408	0.554868	7.19357e-05	2.4192	1
1051	-0.00170515	0.558343	-1.36539e-05	94.8456	4
1052	-0.00833265	0.559985	-0.000222245	226.625	4
1053	-0.0196558	0.557904	-0.000186551	103.591	4
1054	0.0012711	0.565705	7.12378e-06	-30.5586	2
1055	-0.0115289	0.56031	-0.000102383	223.374	4
1056	-0.00152724	0.561583	6.46776e-05	48.582	1
1057	-0.0145428	0.555545	-0.000100876	112.917	4
1058	-0.0106761	0.547141	9.04377e-05	2.1303	1
1059	-0.00152706	0.548679	-3.74797e-05	-182.377	3
1060	0.00341654	0.55023	2.65751e-05	30.8934	1
1061	0.00210936	0.541903	8.81314e-05	-16.6653	2
1062	-0.0173258	0.541171	-0.000127368	50.8806	4
1063	-0.00575466	0.548422	-7.19931e-05	17.6544	4
1064	-0.00568555	0.547245	-0.000157223	94.4118	4
1065	-0.00259049	0.551979	-2.62704e-05	45.4779	4
1066	-0.00187068	0.545968	-4.96071e-05	18.3915	4
1067	-0.000442949	0.545059	-6.45485e-06	50.7735	4
1068	-0.00343429	0.536632	-3.90831e-05	63.9864	4
1069	-0.00233568	0.545024	-1.04143e-05	73.8819	4
1070	-0.000565928	0.547841	3.26004e-05	18.4689	1
1071	-0.0146527	0.543882	0.000203287	-7.0218	2
1072	-0.009501	0.547225	-7.39339e-05	73.9071	4
1073	0.000926056	0.540093	-6.49798e-05	4.3263	4
1074	-0.0370348	0.540425	-2.48713e-05	18.0018	4
1075	-0.00615021	0.554005	-7.29439e-05	227.11	4
1076	0.00228353	0.542468	4.15538e-05	-17.1378	2
1077	0.00133643	0.547548	3.18422e-05	-3.0159	2
1078	0.00680147	0.533672	9.92747e-05	-11.5758	2
1079	0.00129172	0.549901	1.40596e-05	-3.8934	2
1080	0.000401934	0.542725	0.000128685	6.3819	1
1081	-0.00084866	0.548113	-2.27573e-05	11.0457	4
1082	-0.00132269	0.547234	2.85974e-05	6.6411	1
1083	-0.000790048	0.544418	-1.92069e-05	-1.0278	3
1084	0.00223792	0.547868	6.52345e-05	3.2922	1
1085	-0.000871549	0.551417	1.85502e-07	-4.6521	2
1086	-0.000574957	0.553081	0.000100545	12.3723	1
1087	0.0024639	0.590569	9.56828e-05	3.258	1
1088	-0.00521798	0.559026	-8.54141e-05	506.646	4
1089	-0.00772615	0.555228	-5.92541e-05	243.183	4
1090	-0.0131081	0.559455	-7.43058e-05	350.698	4
1091	-0.00640502	0.554604	-0.000117815	181.13	4
1092	-0.00138379	0.539426	2.16365e-05	337.438	1
1093	-0.0058954	0.555462	-0.000126114	416.216	4
1094	-0.00319215	0.557117	0.000123849	877.34	1
1095	-0.00995234	0.549427	-7.55623e-05	730.774	4
1096	-0.00522615	0.562798	-0.000177249	186.425	4
1097	0.00067795	0.537743	-0.000142863	-13.9977	3
1098	0.000889136	0.549005	1.50238e-05	-3.1689	2
1099	0.000362989	0.55181	-1.24094e-06	-7.335	3
1100	0.000512881	0.536339	1.88356e-05	30.9618	1
1101	0.00421088	0.543741	0.000168981	-5.4747	2
1102	0.0095491	0.549292	0.000116835	-20.0286	2
1103	0.00432683	0.549242	4.04988e-05	37.3977	1
1104	0.00118009	0.549954	4.72776e-05	-10.2969	2
1105	-4.12622e-05	0.559142	0.000201252	-64.8837	2
1106	0.00388167	0.548713	0.000113062	2.1267	1
1107	-0.0101806	0.555023	0.000104676	257.305	1
1108	-0.0112105	0.54014	-0.00036307	49.3173	4
1109	-0.00702192	0.537522	-0.00016329	122.004	4
1110	-0.00110821	0.538407	0.000103912	5.0607	1
1111	-0.007243	0.551316	-1.2582e-05	100.19	4
1112	-0.00743865	0.547445	1.59677e-05	92.3922	1
1113	-0.0243472	0.545676	-0.000181553	273.589	4
1114	0.00170538	0.550071	5.13388e-05	-14.8779	2
1115	-0.000845046	0.550195	-4.01663e-06	31.7835	4
1116	-0.0234361	0.550415	-9.53431e-05	500.723	4
1117	-0.0232841	0.546535	-0.000190057	346.303	4
1118	-0.0375278	0.552911	-1.65519e-05	492.374	4
1119	-0.0212361	0.553596	-0.000162537	489.024	4
1120	-0.0310327	0.552085	1.36658e-05	157.774	1
1121	-0.0304833	0.560496	8.49977e-05	432.231	1
1122	-0.0277758	0.551836	-2.4798e-05	507.057	4
1123	-0.0502284	0.549699	-0.000191935	543.367	4
1124	-0.00987281	0.549622	-4.33273e-05	51.0534	4
1125	-0.0165015	0.545113	-4.54388e-05	44.3043	4
1126	-0.00171371	0.547036	-6.5154e-06	37.5876	4
1127	-0.00456665	0.550184	-7.84929e-05	297.418	4
1128	-0.00539783	0.557855	2.08727e-05	18.4554	1
1129	-0.0113804	0.543006	-1.7416e-05	125.153	4
1130	-0.00416891	0.550859	-0.000144278	1652.87	4
1131	-0.0380671	0.547604	-0.000191882	522.191	4
1132	0.00498412	0.553567	1.61368e-05	81.234	1
1133	0.00477422	0.551223	-0.000105508	607.947	4
1134	-0.0116051	0.552584	-7.65695e-05	107.519	4
1135	-0.0244693	0.5663	-1.0585e-05	75.3066	4
1136	-0.120169	0.538263	-8.38996e-05	272.031	4
1137	-0.0534352	0.550391	-0.000130723	777.864	4
1138	-0.0206795	0.552509	-0.000101064	605.835	4
1139	0.000951695	0.558969	-3.32193e-06	94.3884	4
1140	-0.00391626	0.556725	-5.07658e-05	38.7459	4
1141	-0.0095268	0.563201	-0.000109682	132.542	4
1142	-0.00878006	0.557572	-0.000227256	272.433	4
1143	-0.00833308	0.562869	-0.000117687	592.669	4
1144	0.00564098	0.560345	6.84671e-05	145.436	1
1145	-0.0373224	0.554087	1.32031e-05	327.617	1
1146	-0.00998184	0.536774	5.2769e-05	303.893	1
1147	-0.0224026	0.540042	8.98874e-05	36.2313	1
1148	0.000226781	0.551428	-5.76766e-05	103.398	4
1149	-0.0871505	0.554667	-0.000452887	139.626	4
1150	-0.0039476	0.555456	-6.97001e-05	125.061	4
1151	-0.0631259	0.551741	-0.000478034	1766.32	4
1152	0.00281468	0.559043	-0.000181305	801.063	4
1153	-0.054402	0.549773	-0.000258797	995.866	4
1154	-0.0489262	0.544725	-0.000161745	203.602	4
1155	-0.0251934	0.554657	-0.00017574	271.401	4
1156	-0.000340998	0.544487	8.60065e-05	-8.2071	2
1157	-0.000444771	0.543805	7.72068e-05	96.9768	1
1158	-0.00356494	0.552049	-3.87553e-05	147.631	4
1159	0	0.519948	4.94809e-20	-6.5889	2
1160	-0.0113847	0.549862	-0.000143502	161.276	4
1161	-0.00212578	0.555121	-4.59804e-06	106.171	4
1162	0.00369452	0.542888	4.84374e-05	127.563	1
1163	0.00571023	0.54425	6.70893e-05	11.718	1
1164	0.00043052	0.55579	-4.08577e-05	287.438	4
1165	-0.0507357	0.553776	-0.0002067	1728.42	4
1166	-0.0325437	0.556277	-0.00014263	1003.41	4
1167	-0.00649974	0.548483	4.4064e-05	356.101	1
1168	-0.030234	0.546383	-0.000113878	558.577	4
1169	-0.0110929	0.549806	-5.66593e-05	306.985	4
1170	0.00777807	0.535765	-7.30914e-05	38.6415	4
1171	0.0128661	0.544571	6.81913e-05	21.366	1
1172	0.0321436	0.545459	5.03e-05	-16.9029	2
1173	-0.00220489	0.53343	-5.04311e-05	47.6073	4
1174	-0.0204476	0.547491	-0.000159936	100.57	4
1175	-0.000231284	0.545525	-2.62413e-05	95.6394	4
1176	-0.00908606	0.545435	6.61033e-05	85.3677	1
1177	-0.00838239	0.552337	-7.26885e-05	51.2721	4
1178	0.020567	0.549959	-0.00017346	-62.532	3
1179	-0.0130922	0.55043	-7.72174e-05	128.184	4
1180	0.000603074	0.55627	6.06477e-05	237.289	1
1181	0.013921	0.559	5.48205e-05	-19.9179	2
1182	0.00892297	0.554154	0.000130739	-0.9252	2

## Sheet: Sheet1
RID	bias	mean	slope	Area	Type
1001	0.00575238	0.554549	0.00468849	-178.737	2
1002	0.000979823	0.552713	-0.000639947	11.628	4
1003	0.0680086	0.545835	0.00201383	-98.5023	2
1004	-0.0116522	0.544801	0.000411332	16.7859	1
1005	-0.0141124	0.550346	-0.00148348	81.567	4
1006	0.00309519	0.547324	0.000661192	-39.9339	2
1007	0.00160422	0.550449	0.00117545	-56.5137	2
1008	0.00137262	0.555187	-6.31773e-05	-32.1228	3
1009	0	0.558139	0.0040754	-3.3975	2
1010	-0.00601185	0.545142	-0.000610822	38.4435	4
1011	-0.00943071	0.555028	-0.000437608	14.9004	4
1012	-0.00613679	0.544866	0.00146617	-19.7244	2
1013	-0.00664293	0.548296	-0.00236635	43.2189	4
1014	-0.00141915	0.549677	-0.000274724	25.0389	4
1015	0.00794211	0.546716	0.000130367	4.8861	1
1016	-0.000244604	0.544981	0.00102597	-13.6323	2
1017	0.0016713	0.551106	0.000136151	2.3004	1
1018	-0.00149979	0.547695	-0.000176341	21.7557	4
1019	-0.000583743	0.551469	-0.000544866	33.975	4
1020	0.00464801	0.540227	0.000299638	0.3195	1
1021	0.00193323	0.545247	0.000112645	8.883	1
1022	0.000934114	0.54448	-0.000147246	8.3025	4
1023	-0.0128117	0.545237	-0.00184272	20.7585	4
1024	-0.00977655	0.55516	-0.000832998	70.3665	4
1025	0.00329866	0.549318	-0.000820447	19.4805	4
1026	-0.00402174	0.54299	-0.00107319	89.478	4
1027	0.00424255	0.555361	0.00446709	-27.0495	2
1028	-0.00245613	0.550108	0.00051229	8.0163	1
1029	0.00146767	0.547813	-0.00148384	3.2859	4
1030	0.005228	0.544204	-0.00194912	36.6813	4
1031	-0.00302856	0.560914	-0.00111405	30.9483	4
1032	-0.00341245	0.551805	-0.000903678	13.9068	4
1033	0.00447304	0.549334	0.00420785	-22.5171	2
1034	-0.0100648	0.558158	-0.000735279	10.1916	4
1035	0.00566954	0.564485	0.00155786	-8.1765	2
1036	-0.00197938	0.56854	0.000939026	-9.3312	2
1037	-0.00720711	0.554577	-0.00110011	88.7814	4
1038	-0.00180953	0.55562	-0.00245251	180.092	4
1039	0.00508755	0.553555	0.00185041	-8.847	2
1040	-0.000919262	0.545635	-0.000132391	17.9262	4
1041	-0.00123464	0.556931	0.000775463	-5.0679	2
1042	-0.0193941	0.544102	-0.00136484	-2.7306	3
1043	-0.00956098	0.554749	-0.00220994	50.9598	4
1044	0.00978363	0.553003	0.00121152	-1.674	2
1045	-0.00330163	0.550034	0.000786007	-11.4219	2
1046	0.000711655	0.55382	1.16221e-05	59.5611	1
1047	-0.00612064	0.548979	-0.000620958	40.0662	4
1048	-0.0168831	0.540705	0.00350028	0.4734	1
1049	-0.00115488	0.549774	0.000141024	7.8138	1
1050	0.0160408	0.554868	-0.000113425	2.4192	4
1051	-0.00170515	0.558343	-6.28263e-05	94.8456	4
1052	-0.00833265	0.559985	-0.00173548	226.625	4
1053	-0.0196558	0.557904	-0.00101588	103.591	4
1054	0.0012711	0.565705	0.000824527	-30.5586	2
1055	-0.0115289	0.56031	-0.00168244	223.374	4
1056	-0.00152724	0.561583	-0.00146863	48.582	4
1057	-0.0145428	0.555545	-0.0010503	112.917	4
1058	-0.0106761	0.547141	-0.000445496	2.1303	4
1059	-0.00152706	0.548679	0.00444679	-182.377	2
1060	0.00341654	0.55023	-0.000795463	30.8934	4
1061	0.00210936	0.541903	0.000150532	-16.6653	2
1062	-0.0173258	0.541171	-0.000275221	50.8806	4
1063	-0.00575466	0.548422	-0.000902518	17.6544	4
1064	-0.00568555	0.547245	-0.00319639	94.4118	4
1065	-0.00259049	0.551979	-0.000359069	45.4779	4
1066	-0.00187068	0.545968	-5.92472e-05	18.3915	4
1067	-0.000442949	0.545059	-0.000482276	50.7735	4
1068	-0.00343429	0.536632	-0.00161507	63.9864	4
1069	-0.00233568	0.545024	-0.000933481	73.8819	4
1070	-0.000565928	0.547841	-0.000424888	18.4689	4
1071	-0.0146527	0.543882	-0.000499838	-7.0218	3
1072	-0.009501	0.547225	-0.00189739	73.9071	4
1073	0.000926056	0.540093	-0.0004272	4.3263	4
1074	-0.0370348	0.540425	-0.00160407	18.0018	4
1075	-0.00615021	0.554005	-0.00374911	227.11	4
1076	0.00228353	0.542468	0.00029542	-17.1378	2
1077	0.00133643	0.547548	-0.000190801	-3.0159	3
1078	0.00680147	0.533672	0.000666686	-11.5758	2
1079	0.00129172	0.549901	0.000213284	-3.8934	2
1080	0.000401934	0.542725	-0.000450515	6.3819	4
1081	-0.00084866	0.548113	-0.000361569	11.0457	4
1082	-0.00132269	0.547234	-0.000377208	6.6411	4
1083	-0.000790048	0.544418	-4.52207e-05	-1.0278	3
1084	0.00223792	0.547868	0.000136909	3.2922	1
1085	-0.000871549	0.551417	0.000284882	-4.6521	2
1086	-0.000574957	0.553081	-0.00143586	12.3723	4
1087	0.0024639	0.590569	0.000801347	3.258	1
1088	-0.00521798	0.559026	-0.00335322	506.646	4
1089	-0.00772615	0.555228	-0.00204812	243.183	4
1090	-0.0131081	0.559455	-0.00422607	350.698	4
1091	-0.00640502	0.554604	-0.00311747	181.13	4
1092	-0.00138379	0.539426	-0.00476136	337.438	4
1093	-0.0058954	0.555462	-0.00379137	416.216	4
1094	-0.00319215	0.557117	-0.00205508	877.34	4
1095	-0.00995234	0.549427	-0.00456984	730.774	4
1096	-0.00522615	0.562798	-0.00299692	186.425	4
1097	0.00067795	0.537743	0.00273906	-13.9977	2
1098	0.000889136	0.549005	0.000128281	-3.1689	2
1099	0.000362989	0.55181	-0.000189849	-7.335	3
1100	0.000512881	0.536339	8.05869e-06	30.9618	1
1101	0.00421088	0.543741	0.00034964	-5.4747	2
1102	0.0095491	0.549292	-0.0013751	-20.0286	3
1103	0.00432683	0.549242	-0.00177754	37.3977	4
1104	0.00118009	0.549954	0.000233279	-10.2969	2
1105	-4.12622e-05	0.559142	0.000473628	-64.8837	2
1106	0.00388167	0.548713	0.00145315	2.1267	1
1107	-0.0101806	0.555023	-0.00114615	257.305	4
1108	-0.0112105	0.54014	-0.000108189	49.3173	4
1109	-0.00702192	0.537522	-0.00164563	122.004	4
1110	-0.00110821	0.538407	-0.00340486	5.0607	4
1111	-0.007243	0.551316	-0.00244836	100.19	4
1112	-0.00743865	0.547445	-0.000497202	92.3922	4
1113	-0.0243472	0.545676	-0.000645379	273.589	4
1114	0.00170538	0.550071	0.0013627	-14.8779	2
1115	-0.000845046	0.550195	-0.00174999	31.7835	4
1116	-0.0234361	0.550415	-0.00239052	500.723	4
1117	-0.0232841	0.546535	-0.0030873	346.303	4
1118	-0.0375278	0.552911	-0.00539178	492.374	4
1119	-0.0212361	0.553596	-0.00360352	489.024	4
1120	-0.0310327	0.552085	-0.00264593	157.774	4
1121	-0.0304833	0.560496	-0.00363599	432.231	4
1122	-0.0277758	0.551836	-0.00576834	507.057	4
1123	-0.0502284	0.549699	-0.00201546	543.367	4
1124	-0.00987281	0.549622	-0.00140628	51.0534	4
1125	-0.0165015	0.545113	-0.00177559	44.3043	4
1126	-0.00171371	0.547036	-0.000511649	37.5876	4
1127	-0.00456665	0.550184	-0.00205986	297.418	4
1128	-0.00539783	0.557855	-0.00130897	18.4554	4
1129	-0.0113804	0.543006	-0.00203431	125.153	4
1130	-0.00416891	0.550859	-0.00781887	1652.87	4
1131	-0.0380671	0.547604	-0.00415701	522.191	4
1132	0.00498412	0.553567	-0.00274673	81.234	4
1133	0.00477422	0.551223	-0.00447487	607.947	4
1134	-0.0116051	0.552584	-0.00390044	107.519	4
1135	-0.0244693	0.5663	-0.00407587	75.3066	4
1136	-0.120169	0.538263	-0.0101943	272.031	4
1137	-0.0534352	0.550391	-0.00465684	777.864	4
1138	-0.0206795	0.552509	-0.00426162	605.835	4
1139	0.000951695	0.558969	-0.000634008	94.3884	4
1140	-0.00391626	0.556725	-0.00131431	38.7459	4
1141	-0.0095268	0.563201	-0.00239887	132.542	4
1142	-0.00878006	0.557572	-0.00241416	272.433	4
1143	-0.00833308	0.562869	-0.00253977	592.669	4
1144	0.00564098	0.560345	0.00153933	145.436	1
1145	-0.0373224	0.554087	-0.00032019	327.617	4
1146	-0.00998184	0.536774	-0.00193799	303.893	4
1147	-0.0224026	0.540042	-0.00034866	36.2313	4
1148	0.000226781	0.551428	-0.0018115	103.398	4
1149	-0.0871505	0.554667	-0.00426457	139.626	4
1150	-0.0039476	0.555456	-0.0018884	125.061	4
1151	-0.0631259	0.551741	-0.00362772	1766.32	4
1152	0.00281468	0.559043	-0.00425405	801.063	4
1153	-0.054402	0.549773	-0.00443422	995.866	4
1154	-0.0489262	0.544725	-0.00339091	203.602	4
1155	-0.0251934	0.554657	-0.00205562	271.401	4
1156	-0.000340998	0.544487	-0.000371298	-8.2071	3
1157	-0.000444771	0.543805	-0.000616044	96.9768	4
1158	-0.00356494	0.552049	-0.000463413	147.631	4
1159	0	0.519948	0.00153546	-6.5889	2
1160	-0.0113847	0.549862	-0.00156331	161.276	4
1161	-0.00212578	0.555121	-0.000944237	106.171	4
1162	0.00369452	0.542888	-5.89853e-05	127.563	4
1163	0.00571023	0.54425	0.000654567	11.718	1
1164	0.00043052	0.55579	3.82428e-05	287.438	1
1165	-0.0507357	0.553776	-0.00499968	1728.42	4
1166	-0.0325437	0.556277	-0.00290369	1003.41	4
1167	-0.00649974	0.548483	-0.00216446	356.101	4
1168	-0.030234	0.546383	-0.00242016	558.577	4
1169	-0.0110929	0.549806	-0.00132419	306.985	4
1170	0.00777807	0.535765	-0.0030401	38.6415	4
1171	0.0128661	0.544571	-0.00124475	21.366	4
1172	0.0321436	0.545459	-0.000991487	-16.9029	3
1173	-0.00220489	0.53343	-0.000369242	47.6073	4
1174	-0.0204476	0.547491	-0.000663758	100.57	4
1175	-0.000231284	0.545525	-0.00153703	95.6394	4
1176	-0.00908606	0.545435	-0.00197777	85.3677	4
1177	-0.00838239	0.552337	-0.00238581	51.2721	4
1178	0.020567	0.549959	0.00376693	-62.532	2
1179	-0.0130922	0.55043	-0.00110167	128.184	4
1180	0.000603074	0.55627	-0.00121995	237.289	4
1181	0.013921	0.559	0.00040152	-19.9179	2
1182	0.00892297	0.554154	-0.00117965	-0.9252	3

## Sheet: levelmore
	Increased	Decreased
1	1989.75	1196.76	<50
2	8190.7	1829.16	50~100
3	7345.71	2761.33	100~150
4	8364.29	2778.92	150~200
5	4006.26	1641.81	200~250
6	3082.5	1095.81	250~300
7	2872.98	971.169	300~350
8	2230.63	769.288	350~400
9	1350.46	575.819	400~450
10	866.405	357.88	450~500
11	552.878	272.233	500~550
12	401.467	195.763	550~600
13	250.057	142.234	600-650
14	194.234	68.823	650~700
15	130.764	63.4701	700~750
16	88.7052	36.7056	750~800
17	54.2937	16.8234	800~850
18	22.1763	13.7646	850~900
19	25.2351	22.1763	900~950
20	11.4705	14.5293	950~1000
21	16.0587	9.1764	≥1000
Slope	Increased	Decreased
0	35438.3	12060
1	4685.66	2012.18
2	1409.61	626.494
3	465.52	176.202
4	119.643	50.0325
5	50.0325	23.9286
6	15.2273	6.52598
7	8.70131	2.17533
8	2.17533	0
9	0	0
11	0	0
km2	1000000
	Increased	Decreased	In%	De%
<50	1989.75	1196.76	0.047322	0.0806784
50~100	8190.7	1829.16	0.194799	0.123312
100~150	7345.71	2761.33	0.174702	0.186153
150~200	8364.29	2778.92	0.198927	0.187339
200~250	4006.26	1641.81	0.0952805	0.110682
250~300	3082.5	1095.81	0.0733109	0.0738736
300~350	2872.98	971.169	0.0683277	0.0654707
350~400	2230.63	769.288	0.0530508	0.051861
400~450	1350.46	575.819	0.0321179	0.0388184
450~500	866.405	357.88	0.0206056	0.0241262
500-600	954.345	467.996	0.0226971	0.0315496
600-700	444.291	211.057	0.0105665	0.0142283
700-800	219.469	100.176	0.00521961	0.00675327
800-900	76.47	30.588	0.00181868	0.00206207
900-1000	36.7056	36.7056	0.000872965	0.00247448
≥1000	16.0587	9.1764	0.000381922	0.00061862
	42047	14833.6
	Increased	Decreased	In%	De%
0~1	35438.3	12060	0.839872	0.806283
1~2	4685.66	2012.18	0.111048	0.134526
2~3	1409.61	626.494	0.0334072	0.0418848
3~4	465.52	176.202	0.0110326	0.0117801
4~5	119.643	50.0325	0.00283549	0.00334497
5~6	50.0325	23.9286	0.00118575	0.00159977
6~7	15.2273	6.52598	0.000360881	0.0004363
7~8	8.70131	2.17533	0.000206217	0.000145433
8~9	2.17533	0	5.15544e-05	0
9~10	0	0	0	0
≥10	0	0	0	0
	42194.8	14957.6
≥5	76.1365	32.6299
≥5	867.956	878.832
	Increased	Decreased
0~1	35438.3	12060
1~2	4685.66	2012.18
2~3	1409.61	626.494
3~4	465.52	176.202
4~5	119.643	50.0325
≥5	76.1365	32.6299
